# Supplementary material
Source: MDPI journal article supplement (https://www.mdpi.com/1999-4907/7/8/163)
Supplement: s1 [file s1]

## Sheet: Table S1
Table S1 Mean canopy and tree height per size class and successional age category
Tree size	Successional age category	Topographical position	Canopy height (m)*	SD	Tree species mean height (m)	SD
Small	1	Flat	7.32	1.64	3.97	0.59
	2	Flat	10.22	1.65	4.32	0.57
	3	Flat	11.86	1.76	4.33	0.75
	2	Hill	9.84	1.73	4.5	0.72
	3	Hill	10.36	1.97	4.32	0.57
Large	1	Flat	7.32	1.64	6.41	1.06
	2	Flat	10.22	1.65	7.93	1.01
	3	Flat	11.86	1.76	8.8	0.93
	2	Hill	9.84	1.73	7.74	1.04
	3	Hill	10.36	1.97	7.84	1.19
			*Average of the 10 largest individuals per plot

## Sheet: Table S2
Table S2 Total species richness and percentage of species included per plot
Site	Succession_age_category	Topography	Age	Total_species_small	Tree_species_included_small	%species_included_small	Total_species_large	Tree_species_included_large	%species_included_large
101	1	Flat	10	5	4	80	15	12	80
102	1	Flat	7	4	4	100	8	7	87.5
103	3	Flat	60	8	6	75	10	7	70
104	3	Hill	30	12	9	75	80	13	72.22
105	3	Hill	40	5	4	80	20	14	70
106	3	Flat	40	4	4	100	13	10	76.92
107	2	Hill	20	5	5	100	17	17	100
108	1	Flat	7	6	5	83.33	6	5	83.33
109	3	Flat	60	5	5	100	13	9	69.23
201	2	Flat	12	6	6	100	10	10	100
202	2	Flat	20	6	5	83.33	8	7	87.5
203	3	Hill	40	8	7	87.5	14	13	92.86
204	2	Flat	13	2	1	50	7	7	100
205	2	Flat	13	1	1	100	8	8	100
206	3	Flat	40	3	2	66.67	7	6	85.71
207	1	Flat	8	7	5	71.43	4	4	100
208	1	Flat	8	4	3	75	5	4	80
209	2	Hill	20	8	6	75	14	14	100
301	1	Flat	10	4	2	50	8	7	87.5
302	1	Flat	10	3	3	100	6	6	100
303	2	Hill	20	8	6	75	10	6	60
304	2	Hill	20	14	13	92.86	7	7	100
305	1	Flat	6	9	8	88.89	8	4	50
306	2	Flat	25	11	6	54.55	14	11	78.57
307	1	Flat	8	5	5	100	7	6	85.71
308	2	Flat	25	15	12	80	15	14	93.33
309	2	Flat	25	8	7	87.5	18	17	94.44
401	2	Flat	12	8	6	75	11	11	100
402	3	Flat	50	7	5	71.43	13	12	92.31
403	3	Hill	50	6	5	83.33	18	15	83.33
404	3	Flat	50	6	5	83.33	9	9	100
405	3	Flat	50	6	5	83.33	17	15	88.24
406	3	Flat	50	10	9	90	11	11	100
407	3	Hill	50	10	8	80	13	12	92.31
408	3	Flat	50	4	2	50	14	13	92.86
409	3	Hill	50	6	5	83.33	15	14	93.33
501	3	Hill	60	6	5	83.33	15	12	80
502	3	Hill	60	10	8	80	15	13	86.67
503	1	Flat	10	9	8	88.89	13	11	84.62
504	2	Flat	12	15	13	86.67	11	10	90.91
505	1	Flat	6	14	13	92.86	4	4	100
506	3	Hill	60	10	10	100	17	14	82.35
507	3	Hill	60	11	9	81.82	19	16	84.21
508	3	Flat	60	8	6	75	17	14	82.35
509	1	Flat	10	14	12	85.71	7	7	100
601	1	Flat	5	8	7	87.5	4	3	75
602	2	Flat	15	6	5	83.33	7	6	85.71
603	2	Flat	18	5	3	60	12	11	91.67
604	2	Hill	18	10	8	80	10	9	90
605	1	Flat	6	15	12	80	6	5	83.33
606	3	Flat	30	13	11	84.62	13	12	92.31
607	1	Flat	7	4	4	100	2	2	100
608	2	Hill	20	8	7	87.5	11	9	81.82
609	2	Flat	20	12	10	83.33	12	10	83.33
701	2	Hill	20	9	7	77.78	12	12	100
702	2	Hill	20	8	5	62.5	17	14	82.35
703	1	Flat	7	5	5	100	4	4	100
704	2	Flat	16	3	2	66.67	15	14	93.33
705	2	Hill	16	10	8	80	15	13	86.67
706	1	Flat	7	12	11	91.67	9	9	100
707	2	Flat	14	8	8	100	15	14	93.33
708	2	Hill	16	11	10	90.91	9	8	88.89
709	2	Flat	17	9	8	88.89	14	14	100
801	1	Flat	7	12	11	91.67	6	6	100
802	2	Flat	12	11	9	81.82	11	10	90.91
803	2	Flat	25	9	6	66.67	13	12	92.31
804	2	Hill	17	8	7	87.5	17	15	88.24
805	2	Flat	15	14	12	85.71	14	11	78.57
806	1	Flat	10	2	2	100	7	5	71.43
807	1	Flat	5	5	3	60	1	1	100
808	3	Flat	30	2	2	100	7	7	100
809	2	Flat	15	10	8	80	11	10	90.91
901	1	Flat	10	7	5	71.43	5	5	100
902	2	Flat	16	4	3	75	14	14	100
903	2	Flat	20	4	3	75	13	13	100
904	1	Flat	4	8	7	87.5	4	2	50
905	1	Flat	10	6	5	83.33	15	12	80
906	2	Flat	15	4	4	100	7	7	100
907	2	Flat	20	5	4	80	11	10	90.91
908	2	Flat	15	6	5	83.33	14	14	100
909	1	Flat	8	5	4	80	8	8	100
1001	3	Hill	30	15	11	73.33	18	16	88.89
1002	1	Flat	10	6	6	100	8	8	100
1003	2	Flat	18	12	11	91.67	12	12	100
1004	3	Hill	30	10	9	90	15	14	93.33
1005	1	Flat	6	6	5	83.33	6	6	100
1006	2	Hill	20	8	7	87.5	16	14	87.5
1007	3	Flat	30	12	10	83.33	16	15	93.75
1008	2	Flat	11	5	5	100	15	12	80
1009	1	Flat	8	7	6	85.71	6	5	83.33
1010	3	Flat	30	5	4	80	10	7	70
1011	1	Flat	6	8	7	87.5	5	3	60
1012	1	Flat	6	4	4	100	8	7	87.5
1101	2	Flat	11	2	2	100	8	8	100
1102	2	Hill	20	9	8	88.89	16	13	81.25
1103	1	Flat	10	8	8	100	9	9	100
1104	2	Hill	18	7	5	71.43	10	10	100
1105	3	Flat	35	4	3	75	12	12	100
1106	1	Flat	10	8	8	100	10	8	80
1107	2	Flat	20	4	2	50	11	9	81.82
1108	2	Flat	20	7	5	71.43	14	12	85.71
1109	1	Flat	9	2	2	100	8	8	100
1201	3	Flat	40	8	6	75	9	9	100
1202	1	Flat	10	4	3	75	9	8	88.89
1203	1	Flat	6	5	4	80	1	1	100
1204	1	Flat	8	4	3	75	4	4	100
1205	2	Hill	16	7	6	85.71	7	6	85.71
1206	2	Hill	20	14	11	78.57	18	17	94.44
1207	3	Flat	60	9	7	77.78	17	17	100
1208	2	Hill	16	5	5	100	14	12	85.71
1209	1	Flat	10	2	2	100	7	7	100
1301	2	Flat	25	7	5	71.43	8	6	75
1302	2	Hill	17	4	4	100	13	11	84.62
1303	2	Hill	20	7	6	85.71	17	16	94.12
1304	2	Flat	14	8	8	100	14	13	92.86
1305	1	Flat	10	9	8	88.89	14	12	85.71
1306	1	Flat	9	3	3	100	9	8	88.89
1307	2	Flat	20	10	7	70	9	9	100
1308	2	Flat	16	2	2	100	13	9	69.23
1309	1	Flat	9	11	10	90.91	13	12	92.31
1401	2	Flat	20	3	2	66.67	9	9	100
1402	2	Flat	15	3	3	100	8	8	100
1403	1	Flat	6	12	9	75	3	3	100
1404	2	Hill	18	8	7	87.5	11	9	81.82
1405	2	Flat	25	11	9	81.82	15	15	100
1406	2	Flat	25	8	7	87.5	12	12	100
1407	2	Flat	18	4	3	75	8	8	100
1408	2	Flat	12	10	8	80	12	9	75
1409	2	Flat	12	8	7	87.5	13	11	84.62
1501	2	Hill	25	9	7	77.78	18	15	83.33
1502	3	Hill	30	15	11	73.33	14	13	92.86
1503	3	Flat	30	5	2	40	10	9	90
1504	2	Flat	12	3	2	66.67	8	7	87.5
1505	1	Flat	10	12	11	91.67	16	16	100
1506	3	Hill	30	8	7	87.5	16	12	75
1507	3	Flat	50	8	6	75	11	11	100
1508	1	Flat	6	9	9	100	5	5	100
1509	1	Flat	10	8	7	87.5	11	10	90.91
1601	1	Flat	8	9	6	66.67	12	11	91.67
1602	3	Flat	50	4	4	100	8	7	87.5
1603	3	Hill	40	7	6	85.71	11	10	90.91
1604	1	Flat	5	3	3	100	1	1	100
1605	3	Hill	40	4	3	75	17	14	82.35
1606	1	Flat	8	4	4	100	4	4	100
1607	1	Flat	9	6	6	100	4	4	100
1608	3	Hill	40	7	6	85.71	15	15	100
1609	2	Flat	12	3	3	100	9	9	100
1701	3	Flat	60	9	5	55.56	14	12	85.71
1702	2	Flat	40	4	3	75	8	8	100
1703	3	Hill	40	6	6	100	11	10	90.91
1704	1	Flat	8	7	7	100	5	5	100
1705	1	Flat	10	8	6	75	8	8	100
1706	3	Flat	70	3	3	100	8	8	100
1707	3	Hill	30	11	6	54.55	11	11	100
1708	1	Flat	6	8	6	75	4	4	100
1709	1	Flat	10	3	2	66.67	4	4	100
1801	3	Hill	40	9	7	77.78	12	12	100
1802	3	Hill	45	4	4	100	19	16	84.21
1803	3	Flat	60	6	4	66.67	10	9	90
1804	3	Flat	30	7	7	100	9	8	88.89
1805	3	Flat	60	4	4	100	9	8	88.89
1806	3	Hill	60	2	1	50	11	9	81.82
1807	3	Flat	50	2	1	50	10	9	90
1808	3	Hill	40	4	3	75	13	13	100
1809	3	Flat	50	5	4	80	10	10	100
1901	3	Flat	30	3	3	100	9	9	100
1902	2	Hill	20	2	2	100	16	14	87.5
1903	3	Flat	30	7	5	71.43	13	13	100
1904	1	Flat	8	5	4	80	3	3	100
1905	2	Flat	12	4	3	75	7	7	100
1906	1	Flat	9	9	6	66.67	8	6	75
1907	2	Hill	20	10	7	70	13	10	76.92
1908	1	Flat	7	7	5	71.43	4	4	100
1909	1	Flat	7	5	3	60	5	5	100
2001	2	Hill	25	7	7	100	15	14	93.33
2002	1	Flat	5	7	6	85.71	2	2	100
2003	2	Flat	15	6	4	66.67	8	7	87.5
2004	1	Flat	3	8	6	75	1	1	100
2005	1	Flat	10	4	1	25	8	7	87.5
2006	3	Hill	35	10	6	60	9	9	100
2007	3	Hill	35	6	4	66.67	13	12	92.31
2008	1	Flat	10	8	5	62.5	8	5	62.5
2009	2	Flat	25	8	7	87.5	13	12	92.31
2010	2	Hill	20	7	6	85.71	15	14	93.33
2011	3	Flat	40	4	3	75	10	10	100
2012	2	Flat	20	7	5	71.43	13	12	92.31
2101	3	Flat	30	6	6	100	14	13	92.86
2102	2	Flat	14	9	9	100	13	13	100
2103	2	Flat	14	3	2	66.67	9	8	88.89
2104	2	Hill	20	6	6	100	13	13	100
2105	1	Flat	9	8	8	100	14	14	100
2106	2	Hill	20	7	6	85.71	16	15	93.75
2107	3	Hill	40	10	7	70	15	14	93.33
2108	3	Flat	40	9	7	77.78	15	12	80
2109	3	Flat	35	10	8	80	12	11	91.67
2201	1	Flat	8	9	7	77.78	7	5	71.43
2202	1	Flat	8	8	5	62.5	7	6	85.71
2203	2	Flat	20	3	2	66.67	8	8	100
2204	1	Flat	7	3	2	66.67	0	0	ND
2205	1	Flat	7	4	2	50	0	0	ND
2206	1	Flat	10	10	9	90	11	10	90.91
2207	1	Flat	7	4	4	100	3	3	100
2208	1	Flat	10	12	10	83.33	7	7	100
2209	1	Flat	7	10	9	90	2	2	100
2301	3	Flat	50	11	9	81.82	12	11	91.67
2302	3	Hill	50	5	5	100	13	13	100
2303	3	Flat	60	10	7	70	12	12	100
2304	2	Flat	15	5	4	80	11	11	100
2305	2	Flat	15	3	2	66.67	10	9	90
2306	2	Flat	15	6	5	83.33	10	10	100
2307	2	Flat	15	6	6	100	11	10	90.91
2308	3	Hill	30	10	8	80	22	19	86.36
2309	3	Flat	60	9	6	66.67	12	10	83.33
3010	2	Hill	20	7	6	85.71	7	7	100
3011	1	Flat	10	3	2	66.67	7	6	85.71
3012	1	Flat	8	4	3	75	10	9	90
4010	3	Hill	50	5	4	80	16	15	93.75
4011	3	Flat	50	6	4	66.67	9	8	88.89
4012	3	Flat	50	4	4	100	11	10	90.91
5010	1	Flat	10	14	11	78.57	11	11	100
5011	1	Flat	8	10	9	90	5	5	100
5012	1	Flat	6	8	7	87.5	3	3	100
6010	1	Flat	10	11	9	81.82	10	8	80
6011	2	Hill	13	10	9	90	14	14	100
6012	2	Flat	13	1	1	100	8	8	100
7010	2	Flat	16	7	7	100	16	15	93.75
7011	3	Flat	40	7	5	71.43	8	7	87.5
7012	1	Flat	6	11	10	90.91	6	5	83.33
8010	2	Flat	20	7	4	57.14	4	3	75
8011	1	Flat	4	13	13	100	6	6	100
8012	1	Flat	8	14	12	85.71	9	8	88.89
9010	2	Flat	14	4	4	100	8	8	100
9011	1	Flat	10	4	4	100	15	12	80
9012	2	Flat	20	2	2	100	7	6	85.71
10010	2	Flat	20	7	7	100	14	14	100
10011	1	Flat	7	7	6	85.71	7	6	85.71
10012	2	Flat	25	9	7	77.78	14	12	85.71
11010	1	Flat	10	5	4	80	8	8	100
11011	1	Flat	10	5	5	100	10	8	80
11012	1	Flat	9	5	5	100	6	6	100
12010	2	Flat	15	2	2	100	8	7	87.5
12011	3	Flat	35	3	3	100	12	12	100
12012	3	Flat	40	6	2	33.33	9	5	55.56
13010	1	Flat	10	7	6	85.71	9	9	100
13011	2	Flat	25	8	4	50	16	14	87.5
13012	2	Hill	16	13	11	84.62	7	7	100
14010	1	Flat	6	7	6	85.71	3	3	100
14011	1	Flat	9	9	8	88.89	10	9	90
14012	1	Flat	6	4	4	100	9	9	100
15010	2	Flat	25	6	5	83.33	16	13	81.25
15011	1	Flat	6	8	8	100	6	6	100
15012	1	Flat	10	6	4	66.67	7	7	100
16010	3	Flat	50	1	1	100	13	12	92.31
16011	1	Flat	10	7	5	71.43	5	5	100
16012	3	Flat	60	5	2	40	8	8	100
17010	3	Hill	40	7	6	85.71	9	8	88.89
17011	3	Flat	35	4	2	50	7	6	85.71
17012	1	Flat	8	5	5	100	6	6	100
18010	3	Flat	60	11	7	63.64	12	11	91.67
18011	3	Flat	60	5	4	80	12	10	83.33
18012	3	Flat	40	3	2	66.67	11	10	90.91
19010	1	Flat	10	8	7	87.5	5	5	100
19011	2	Hill	25	2	2	100	13	12	92.31
19012	3	Flat	40	2	2	100	13	11	84.62
20010	3	Flat	40	2	2	100	15	13	86.67
20011	3	Flat	30	4	2	50	6	6	100
20012	1	Flat	6	5	4	80	1	1	100
21010	2	Flat	20	8	5	62.5	12	11	91.67
21011	1	Flat	8	4	3	75	12	11	91.67
21012	3	Flat	30	9	8	88.89	14	12	85.71
22010	1	Flat	10	11	7	63.64	6	5	83.33
22011	2	Flat	11	13	12	92.31	9	7	77.78
22012	2	Flat	12	10	8	80	7	6	85.71
23010	3	Hill	30	8	6	75	15	12	80
23011	3	Flat	35	4	3	75	10	10	100
23012	3	Hill	40	11	10	90.91	15	13	86.67

## Sheet: Table S3
Table S3 Observed and null model values of Functional Indices and Standardized Effect Sizes per plot
Observed and null model values of Functional Indices and Standard Effect Sizes per plot.
Plots in blank are those with 3 or less species.
Site	Succession_age_category	Topography	Age	FRic_small	FDiv_small	FEve_small	SES_FRic_small	SES_FDiv_small	SES_FEve_small	FRic_small_meannull	FDiv_small_meannull	FEve_small_meannull	FRic_large	FDiv_large	FEve_large	FRic_largeSES	FDiv_largeSES	FEve_largeSES	FRic_large_meannull	FDiv_large_meannull	FEve_large_meannull
101	1	Flat	10	1.15	0.74	0.73	-1.01	-0.18	-1.63	5.48	0.76	0.79	14.76	0.84	0.66	-0.57	0.97	0.46	17.4	0.74	0.65
102	1	Flat	7	3.35	0.58	0.36	-0.5	-1.02	0.8	5.54	0.77	0.35	12.32	0.75	0.54	0.19	-0.05	0.09	11.35	0.76	0.54
103	3	Flat	60	3.71	0.63	0.62	-1.17	-1.06	-0.29	9.47	0.76	0.63	15.81	0.74	0.65	0.85	-0.15	0.05	11.39	0.75	0.65
104	3	Hill	30	15.57	0.79	0.8	0.27	0.55	1.99	14.23	0.75	0.75	13.34	0.7	0.6	-1.06	-0.43	-1.83	18.33	0.74	0.64
105	3	Hill	40	1.09	0.79	0.67	-0.98	0.2	0.44	5.16	0.76	0.64	16.51	0.68	0.59	-0.53	-0.54	-1.07	18.95	0.74	0.62
106	3	Flat	40	2.48	0.7	0.92	-0.68	-0.71	1.84	5.31	0.76	0.86	13.33	0.86	0.58	-0.37	0.96	-0.2	15.16	0.75	0.58
107	2	Hill	20	6.83	0.47	0.31	-0.15	-1.59	-0.44	7.53	0.77	0.31	18.6	0.74	0.52	-0.55	-0.03	-0.77	20.86	0.75	0.54
108	1	Flat	7	5.69	0.48	0.2	-0.44	-1.21	0.78	7.82	0.76	0.19	7.03	0.61	0.56	-0.2	-1.03	1.1	7.97	0.76	0.54
109	3	Flat	60	13.93	0.56	0.71	1.31	-2.06	-0.12	7.68	0.76	0.72	17.77	0.77	0.54	0.69	0.22	-0.61	14.28	0.75	0.56
201	2	Flat	12	5.55	0.32	0.52	-0.85	-3.13	0.79	9.74	0.77	0.49	19.05	0.71	0.52	0.73	-0.32	-1.89	15.37	0.75	0.57
202	2	Flat	20	9.3	0.77	0.95	0.3	0.15	0.52	7.87	0.76	0.93	10.61	0.87	0.57	-0.12	0.89	-0.24	11.22	0.75	0.58
203	3	Hill	40	6.18	0.83	0.7	-0.99	0.77	-0.73	11.27	0.75	0.72	13.52	0.77	0.59	-0.99	0.27	-0.38	18.25	0.74	0.6
204	2	Flat	13										14.06	0.86	0.68	0.51	1.21	-0.96	11.44	0.75	0.71
205	2	Flat	13										15.52	0.74	0.7	0.54	-0.18	0.08	12.81	0.75	0.7
206	3	Flat	40										10	0.67	0.48	0.06	-0.55	-1.05	9.7	0.75	0.52
207	1	Flat	8	3.68	0.67	0.69	-0.85	-0.87	0.57	7.64	0.76	0.67	6.15	0.71	0.7	0.15	-0.43	1.21	5.5	0.76	0.64
208	1	Flat	8	0.43	0.97	0.07	-0.7	0.75	-0.96	2.73	0.78	0.07	3.65	0.42	0.64	-0.34	-2.45	1.56	4.98	0.77	0.59
209	2	Hill	20	2.82	0.8	0.66	-1.34	0.42	-1.21	9.49	0.76	0.7	18.18	0.81	0.7	-0.19	0.75	-0.57	19.02	0.75	0.71
301	1	Flat	10										12.15	0.85	0.55	0.15	0.69	-0.67	11.39	0.76	0.57
302	1	Flat	10	3.24	0.59	0.13	0.1	-0.75	0.68	2.88	0.77	0.13	9.15	0.75	0.67	-0.1	-0.09	0.56	9.66	0.76	0.66
303	2	Hill	20	10.09	0.61	0.5	0.1	-0.78	1.85	9.59	0.75	0.46	10.75	0.85	0.5	0.25	0.61	-0.73	9.5	0.76	0.53
304	2	Hill	20	22.73	0.65	0.65	1.02	-0.98	1.28	18.13	0.74	0.62	15.42	0.73	0.67	0.81	-0.25	-0.69	11.28	0.75	0.69
305	1	Flat	6	15.08	0.74	0.71	0.48	-0.13	0.3	12.7	0.75	0.7	5.85	0.57	0.84	0.1	-2.04	1.36	5.44	0.76	0.79
306	2	Flat	25	5.25	0.86	0.65	-0.89	1.08	-1.23	9.65	0.76	0.69	19.55	0.7	0.67	0.64	-0.56	0.16	16.42	0.75	0.66
307	1	Flat	8	4.5	0.61	0.54	-0.67	-1.04	-0.04	7.73	0.76	0.54	9.05	0.74	0.59	-0.08	-0.12	-0.2	9.42	0.75	0.59
308	2	Flat	25	17.02	0.56	0.78	-0.08	-2.35	1.82	17.39	0.74	0.73	20.23	0.68	0.58	0.25	-0.7	-0.28	19.07	0.74	0.59
309	2	Flat	25	6.56	0.89	0.73	-0.92	1.78	-0.98	11.04	0.75	0.76	20.45	0.71	0.67	-0.11	-0.51	-0.82	20.92	0.74	0.68
401	2	Flat	12	3.67	0.74	0.71	-1.15	-0.09	0.46	9.31	0.75	0.69	19.63	0.54	0.58	0.7	-1.72	1.29	16.2	0.74	0.54
402	3	Flat	50	0.92	0.56	0.43	-1.41	-1.28	-1.67	7.99	0.77	0.46	15.03	0.72	0.68	-0.51	-0.29	0.79	17.44	0.74	0.66
403	3	Hill	50	2.88	0.73	0.73	-1	-0.32	0.16	7.47	0.76	0.72	16.62	0.73	0.6	-0.68	-0.14	-0.94	19.61	0.75	0.62
404	3	Flat	50	1.25	0.87	0.69	-1.35	1.2	-1.06	7.54	0.76	0.73	7.8	0.74	0.75	-1.24	-0.12	1.02	14.05	0.75	0.73
405	3	Flat	50	1.01	0.73	0.81	-1.38	-0.31	1.09	7.8	0.76	0.77	13.12	0.81	0.57	-1.67	0.78	-1.17	19.92	0.74	0.6
406	3	Flat	50	7.86	0.76	0.72	-1.25	0.14	-1.25	14.21	0.75	0.75	15.04	0.48	0.66	-0.27	-2.59	0.85	16.35	0.75	0.64
407	3	Hill	50	3.43	0.91	0.58	-1.87	1.44	-0.76	12.79	0.76	0.6	17.38	0.65	0.6	0.02	-0.84	0.53	17.28	0.75	0.58
408	3	Flat	50										18.18	0.69	0.72	-0.01	-0.76	1.31	18.23	0.75	0.69
409	3	Hill	50	5.5	0.61	0.53	-0.43	-0.93	0.77	7.55	0.76	0.51	16.51	0.64	0.43	-0.52	-0.65	-1.36	18.89	0.74	0.46
501	3	Hill	60	3.97	0.67	0.85	-0.76	-1.3	-2.9	7.56	0.76	0.93	16.51	0.68	0.7	-0.16	-0.66	0.58	17.3	0.74	0.69
502	3	Hill	60	10.23	0.75	0.75	-0.53	-0.06	-1.13	12.9	0.75	0.78	8.41	0.78	0.52	-2.19	0.29	-0.01	18.33	0.75	0.52
503	1	Flat	10	15.93	0.52	0.43	0.68	-1.46	0.15	12.57	0.75	0.43	19.28	0.86	0.58	0.6	0.88	0.01	16.42	0.75	0.58
504	2	Flat	12	14.44	0.53	0.57	-0.81	-2.3	0.12	17.98	0.75	0.56	18.35	0.67	0.71	0.56	-0.88	0.16	15.58	0.75	0.71
505	1	Flat	6	17.53	0.71	0.58	-0.14	-0.33	-0.8	18.17	0.74	0.6	7.29	0.8	0.79	0.54	0.4	0.09	5.13	0.76	0.78
506	3	Hill	60	7.03	0.66	0.52	-1.68	-0.66	-0.23	15.39	0.75	0.52	18.23	0.67	0.62	-0.14	-0.94	-0.86	18.85	0.74	0.63
507	3	Hill	60	7.07	0.63	0.69	-1.43	-1.47	0.05	14.15	0.75	0.69	26.62	0.7	0.73	1.5	-0.73	0.25	20.41	0.74	0.72
508	3	Flat	60	9.16	0.68	0.87	-0.06	-1.02	1.09	9.44	0.76	0.84	17.6	0.79	0.73	-0.33	0.74	-0.97	19.08	0.74	0.75
509	1	Flat	10	14.91	0.61	0.74	-0.53	-1.8	1.41	17.36	0.75	0.7	5.42	0.68	0.52	-1.15	-0.63	-0.32	11.27	0.76	0.54
601	1	Flat	5	11.27	0.54	0.32	-0.02	-1.13	0.71	11.34	0.77	0.32	0.94	0.67	0.93	-0.55	-1.55	-0.06	2.52	0.77	0.93
602	2	Flat	15	4.15	0.41	0.21	-0.73	-1.5	1.04	7.52	0.76	0.21	12.79	0.84	0.73	0.65	0.89	-0.32	9.57	0.75	0.74
603	2	Flat	18	0.46	0.86	0.42	-0.74	0.51	-0.38	2.66	0.78	0.43	23.11	0.69	0.58	1.35	-0.43	-0.05	16.49	0.75	0.58
604	2	Hill	18	2.88	0.71	0.55	-1.96	-0.35	2.75	12.65	0.76	0.46	18.6	0.77	0.58	0.94	0.2	-0.18	13.9	0.75	0.59
605	1	Flat	6	11.98	0.63	0.62	-1.17	-1.24	-0.54	17.39	0.75	0.63	3.79	0.8	0.77	-0.82	0.48	1.16	7.51	0.75	0.72
606	3	Flat	30	15.51	0.75	0.68	-0.15	0.01	-1.29	16.23	0.75	0.71	16.52	0.89	0.53	-0.16	1.17	0.79	17.31	0.74	0.51
607	1	Flat	7	1.74	0.77	0.44	-0.88	0.01	-0.62	5.13	0.77	0.46
608	2	Hill	20	9.2	0.62	0.5	-0.44	-0.91	0.18	11.41	0.76	0.49	9.13	0.7	0.7	-0.98	-0.53	-0.22	14	0.75	0.7
609	2	Flat	20	7.97	0.82	0.75	-1.52	1.05	-1.55	15.22	0.75	0.78	15.32	0.86	0.54	0.02	0.94	-0.47	15.23	0.75	0.55
701	2	Hill	20	2.7	0.88	0.64	-1.68	1.28	-1.43	11.24	0.75	0.69	21.95	0.7	0.74	0.98	-0.6	0.94	17.37	0.75	0.72
702	2	Hill	20	6.14	0.69	0.76	-0.3	-0.73	-0.53	7.58	0.76	0.78	21.2	0.75	0.71	0.5	0.15	-0.24	18.93	0.74	0.72
703	1	Flat	7	8.01	0.68	0.62	0.04	-0.63	0.96	7.8	0.76	0.59	2.65	0.67	0.81	-0.62	-0.96	0.48	5.22	0.76	0.8
704	2	Flat	16										16.27	0.88	0.57	-0.59	1.49	-1.97	18.95	0.74	0.62
705	2	Hill	16	3.4	0.81	0.79	-1.87	0.74	0.97	12.79	0.76	0.77	18.44	0.75	0.52	0.1	-0.05	-0.37	17.96	0.75	0.53
706	1	Flat	7	19.08	0.77	0.76	0.53	0.3	0.38	16.57	0.75	0.75	21.11	0.59	0.56	1.44	-1.18	0.67	14.01	0.76	0.55
707	2	Flat	14	9.91	0.52	0.42	-0.57	-1.45	0.4	12.86	0.77	0.41	22.48	0.75	0.67	0.79	0.01	0.22	18.87	0.75	0.66
708	2	Hill	16	3.91	0.63	0.48	-2.3	-0.93	-0.97	15.23	0.75	0.51	19.03	0.81	0.61	1.32	0.59	-0.33	12.68	0.75	0.62
709	2	Flat	17	9.32	0.59	0.64	-0.74	-1.62	0.4	13.07	0.76	0.63	23.42	0.75	0.57	1.02	-0.06	0.11	18.86	0.75	0.57
801	1	Flat	7	21.98	0.4	0.45	1.24	-2.13	1.64	16.24	0.76	0.41	18.47	0.58	0.43	1.81	-1.28	-0.32	9.51	0.76	0.45
802	2	Flat	12	10.96	0.52	0.55	-0.62	-1.93	0.35	14.12	0.76	0.54	17.14	0.74	0.62	0.44	-0.14	0.1	14.96	0.75	0.61
803	2	Flat	25	2.8	0.68	0.54	-1.4	-0.54	1.53	9.71	0.76	0.47	19.9	0.76	0.68	0.59	0.13	-0.36	17.08	0.75	0.69
804	2	Hill	17	6.45	0.86	0.72	-0.94	1.15	-0.12	11.27	0.75	0.72	19.28	0.91	0.52	-0.09	1.18	-0.72	19.65	0.75	0.53
805	2	Flat	15	7.79	0.81	0.54	-2.02	0.5	1.37	17.41	0.75	0.5	17.08	0.77	0.58	0.17	0.24	-1.15	16.26	0.75	0.61
806	1	Flat	10										4.96	0.79	0.68	-0.57	0.25	2.77	7.64	0.76	0.6
807	1	Flat	5	0.62	0.76	0.5	-0.67	-0.08	-0.16	2.76	0.77	0.5
808	3	Flat	30										16.75	0.79	0.47	1.08	0.26	-0.38	11.3	0.75	0.48
809	2	Flat	15	9.91	0.78	0.74	-0.57	0.34	1.3	12.76	0.75	0.7	19.6	0.79	0.54	0.92	0.38	0.14	15.17	0.75	0.54
901	1	Flat	10	7.04	0.48	0.52	-0.08	-1.81	0.81	7.44	0.77	0.5	9.35	0.87	0.52	0.42	0.8	-0.72	7.42	0.75	0.54
902	2	Flat	16	3.58	0.82	0.35	0.34	0.22	0.07	2.55	0.78	0.35	16.06	0.82	0.53	-0.61	0.72	0.3	18.85	0.75	0.53
903	2	Flat	20	0.03	0.87	0.47	-0.89	0.71	-2.97	2.51	0.77	0.55	17.38	0.54	0.5	-0.12	-1.57	0.26	17.91	0.75	0.5
904	1	Flat	4	12.78	0.84	0.56	0.26	0.62	0.49	11.45	0.75	0.55
905	1	Flat	10	1.26	0.64	0.55	-1.35	-0.9	-0.6	7.57	0.76	0.57	19.16	0.79	0.48	0.41	0.32	-0.91	17.23	0.75	0.51
906	2	Flat	15	2	0.62	0.56	-0.8	-0.9	1.57	5.58	0.76	0.5	8.95	0.84	0.65	-0.47	0.7	1.34	11.3	0.76	0.61
907	2	Flat	20	3.88	0.61	0.68	-0.33	-1.37	0.04	5.29	0.76	0.68	17.59	0.85	0.64	0.47	0.82	1.56	15.21	0.74	0.6
908	2	Flat	15	1.57	0.77	0.63	-1.33	0.16	-3.07	7.47	0.76	0.74	14.81	0.72	0.62	-0.9	-0.29	0.86	18.9	0.75	0.6
909	1	Flat	8	2.54	0.18	0.23	-0.68	-2.69	1.46	5.39	0.77	0.22	7.97	0.46	0.55	-0.99	-1.95	1.34	12.95	0.75	0.53
1001	3	Hill	30	12.84	0.55	0.44	-0.67	-1.19	-0.46	16.13	0.75	0.44	17.6	0.78	0.59	-0.63	0.32	0.84	20.3	0.75	0.58
1002	1	Flat	10	4.47	0.42	0.26	-1.03	-1.64	0.94	9.75	0.77	0.26	21.1	0.75	0.8	1.69	0.02	0.82	12.73	0.75	0.79
1003	2	Flat	18	12.91	0.61	0.73	-0.72	-1.88	0.55	16.37	0.75	0.72	19.58	0.62	0.63	0.52	-1.29	0.8	17.14	0.75	0.62
1004	3	Hill	30	6.02	0.77	0.84	-1.57	0.31	1.36	14.08	0.75	0.81	20.75	0.81	0.57	0.37	0.71	-1.22	19.06	0.75	0.59
1005	1	Flat	6	17.14	0.68	0.5	1.98	-0.53	-0.95	7.75	0.76	0.53	5.18	0.77	0.44	-0.87	0.09	-0.71	9.47	0.75	0.47
1006	2	Hill	20	4.9	0.63	0.7	-1.3	-1.39	-0.05	11.35	0.76	0.7	18.79	0.7	0.69	0	-0.5	0.53	18.78	0.74	0.68
1007	3	Flat	30	3.93	0.85	0.67	-2.28	1.21	0	15.2	0.75	0.67	17.27	0.86	0.53	-0.52	1.28	-1.38	19.51	0.75	0.57
1008	2	Flat	11	4.86	0.66	0.38	-0.59	-0.6	0.55	7.55	0.77	0.37	15.28	0.77	0.6	-0.43	0.35	-1.72	17.32	0.74	0.64
1009	1	Flat	8	20.46	0.46	0.34	2.16	-1.58	0.58	9.69	0.76	0.33	7.76	0.84	0.54	0.03	0.47	-0.02	7.62	0.77	0.54
1010	3	Flat	30	5.7	0.63	0.55	0.08	-0.92	0.54	5.36	0.77	0.53	13	0.84	0.58	0.29	0.72	-0.22	11.46	0.75	0.59
1011	1	Flat	6	10.42	0.34	0.22	-0.23	-1.94	1.1	11.59	0.76	0.21	2.42	0.67	0.76	-0.05	-1.01	0.64	2.57	0.77	0.73
1012	1	Flat	6	2.67	0.52	0.3	-0.62	-1.33	0.66	5.32	0.78	0.29	11.44	0.85	0.51	-0.01	0.84	-1.04	11.47	0.75	0.55
1101	2	Flat	11										17.84	0.6	0.62	0.92	-1.3	0.34	13.06	0.75	0.61
1102	2	Hill	20	15.18	0.66	0.66	0.54	-0.91	-0.38	12.53	0.75	0.67	11.5	0.84	0.56	-1.47	1.02	-0.5	18.37	0.75	0.57
1103	1	Flat	10	3.95	0.61	0.7	-1.72	-1.47	0.2	12.77	0.76	0.69	13.02	0.83	0.55	-0.25	0.79	-1.63	14.24	0.75	0.59
1104	2	Hill	18	1.88	0.71	0.77	-1.23	-0.48	1.52	7.5	0.76	0.72	13.34	0.73	0.6	-0.41	-0.23	-1.08	15.4	0.75	0.62
1105	3	Flat	35	7.49	0.92	0.33	1.63	0.77	-0.22	2.61	0.78	0.33	20.51	0.79	0.62	0.64	0.43	-0.32	17.32	0.75	0.63
1106	1	Flat	10	8	0.6	0.72	-0.94	-1.79	0.71	12.78	0.75	0.7	12.64	0.64	0.68	-0.01	-1.28	0.43	12.69	0.75	0.67
1107	2	Flat	20										13.41	0.61	0.7	-0.13	-1.61	0.06	14.08	0.75	0.7
1108	2	Flat	20	2.15	0.76	0.46	-1.14	0.01	-0.83	7.52	0.76	0.49	17.1	0.59	0.62	-0.02	-1.84	-1.01	17.18	0.74	0.64
1109	1	Flat	9										14.93	0.5	0.52	0.36	-1.62	1.38	13.07	0.75	0.49
1201	3	Flat	40	1.99	0.54	0.74	-1.63	-2.48	-0.03	9.97	0.76	0.74	15.63	0.62	0.75	0.26	-1.6	2.55	14.29	0.75	0.68
1202	1	Flat	10	2.96	0.5	0.28	0.09	-1.35	0.81	2.69	0.78	0.27	17.76	0.85	0.59	0.91	0.96	-0.73	12.98	0.75	0.61
1203	1	Flat	6	4.59	0.96	0.28	-0.18	0.91	-0.16	5.32	0.78	0.28
1204	1	Flat	8	3.24	0.64	0.28	0.1	-0.61	0.45	2.88	0.77	0.28	2.49	0.84	0.61	-0.64	0.58	-0.49	5.07	0.76	0.63
1205	2	Hill	16	3.79	0.67	0.69	-1.09	-0.76	2.13	9.44	0.76	0.6	17.84	0.59	0.66	1.68	-1.49	0.43	9.54	0.76	0.64
1206	2	Hill	20	14.82	0.58	0.58	-0.29	-1.38	-0.13	16.28	0.75	0.58	19.74	0.66	0.7	-0.3	-1.12	0.41	20.99	0.74	0.69
1207	3	Flat	60	3.61	0.83	0.8	-1.56	1.01	0.1	11.42	0.75	0.8	9.59	0.71	0.66	-2.74	-0.4	0.8	20.82	0.74	0.65
1208	2	Hill	16	6.72	0.43	0.24	-0.15	-1.41	0.27	7.45	0.75	0.24	18.23	0.67	0.56	0.21	-0.7	-0.15	17.25	0.75	0.56
1209	1	Flat	10										9.11	0.87	0.6	-0.45	0.91	0.61	11.39	0.75	0.59
1301	2	Flat	25	1.62	0.84	0.78	-1.31	1.03	-1.47	7.76	0.76	0.83	4.18	0.81	0.61	-1.14	0.47	-0.39	9.68	0.76	0.63
1302	2	Hill	17	1.76	0.66	0.74	-0.82	-0.91	0.4	5.29	0.76	0.73	18.03	0.77	0.6	0.35	0.22	-0.42	16.35	0.74	0.6
1303	2	Hill	20	4.98	0.96	0.28	-0.9	0.96	0.04	9.39	0.76	0.28	11.75	0.86	0.58	-2.08	1.29	-0.1	20.51	0.74	0.58
1304	2	Flat	14	3.06	0.8	0.76	-1.95	0.64	-0.2	12.89	0.75	0.77	17.21	0.87	0.6	-0.2	1.11	-0.64	18.14	0.73	0.61
1305	1	Flat	10	5.8	0.85	0.49	-1.39	0.77	-0.03	12.64	0.76	0.49	19.25	0.66	0.54	0.43	-0.9	-0.28	17.24	0.75	0.54
1306	1	Flat	9	0.74	0.98	0.18	-0.63	0.85	0.87	2.65	0.78	0.18	14.51	0.73	0.55	0.33	-0.22	-0.79	12.82	0.75	0.57
1307	2	Flat	20	1.96	0.73	0.7	-1.86	-0.29	0.98	11.61	0.76	0.67	19.9	0.83	0.64	1.18	0.9	-0.73	14	0.75	0.66
1308	2	Flat	16										11.62	0.56	0.71	-0.5	-2.25	0.41	14.12	0.75	0.7
1309	1	Flat	9	5.01	0.86	0.62	-2.05	1.22	-0.72	15.25	0.75	0.64	23.09	0.85	0.63	1.25	1	-0.12	17.28	0.75	0.63
1401	2	Flat	20										16.36	0.64	0.73	0.43	-1.26	0.17	14.18	0.75	0.73
1402	2	Flat	15	1.94	0.56	0.13	-0.26	-0.97	0.75	2.73	0.79	0.13	15.31	0.67	0.56	0.48	-0.72	0.04	12.88	0.76	0.56
1403	1	Flat	6	6.87	0.82	0.48	-1.51	0.55	-0.45	14.09	0.75	0.49	1.24	0.78	0.76	-0.47	0.03	0.37	2.55	0.77	0.75
1404	2	Hill	18	5.82	0.64	0.49	-1.1	-0.81	0.3	11.31	0.75	0.48	9.91	0.74	0.56	-0.78	-0.11	0.31	14.02	0.75	0.55
1405	2	Flat	25	9.59	0.6	0.65	-0.95	-1.54	0.07	14.29	0.75	0.65	21.39	0.72	0.57	0.39	-0.31	-0.19	19.68	0.75	0.58
1406	2	Flat	25	6.98	0.75	0.78	-0.87	0.02	0.7	11.26	0.75	0.76	11.93	0.8	0.69	-1.14	0.62	-0.55	17.37	0.74	0.69
1407	2	Flat	18	1.83	0.51	0.39	-0.27	-1.46	1.51	2.66	0.78	0.38	16.56	0.53	0.68	0.74	-1.88	1.31	12.74	0.75	0.64
1408	2	Flat	12	7.29	0.78	0.78	-1.09	0.43	0.4	12.71	0.75	0.76	18.02	0.72	0.62	0.77	-0.34	0.58	14.12	0.75	0.6
1409	2	Flat	12	10.99	0.81	0.73	-0.05	0.54	0.26	11.24	0.75	0.72	18.34	0.88	0.6	0.45	1.36	-0.48	16.16	0.75	0.61
1501	2	Hill	25	5.3	0.83	0.75	-1.2	0.95	0.58	11.18	0.75	0.73	17.76	0.65	0.6	-0.47	-0.77	0.23	19.77	0.74	0.59
1502	3	Hill	30	12.72	0.75	0.84	-0.7	0.08	0.72	16.12	0.75	0.82	17.55	0.82	0.56	-0.17	0.72	-0.26	18.34	0.75	0.56
1503	3	Flat	30										15.6	0.79	0.53	0.27	0.36	-0.65	14.25	0.74	0.55
1504	2	Flat	12										8.37	0.59	0.58	-0.6	-1.48	-0.53	11.45	0.75	0.6
1505	1	Flat	10	11.74	0.6	0.6	-0.96	-1.54	0	16.36	0.75	0.6	12.81	0.9	0.53	-1.88	1.33	-1.27	20.65	0.75	0.56
1506	3	Hill	30	5.42	0.78	0.72	-1.15	0.26	0.51	11.2	0.75	0.7	13.34	0.72	0.72	-0.82	-0.27	-0.61	17.26	0.74	0.73
1507	3	Flat	50	3.58	0.74	0.95	-1.16	-0.29	0.62	9.36	0.76	0.93	13.65	0.79	0.57	-0.62	0.41	-0.85	16.55	0.74	0.6
1508	1	Flat	6	8.94	0.55	0.38	-1.02	-1.08	0.05	14.2	0.75	0.38	4.18	0.64	0.67	-0.71	-1.1	0.83	7.57	0.76	0.63
1509	1	Flat	10	5.63	0.89	0.62	-1.07	1.31	-0.38	11.07	0.75	0.63	15.6	0.7	0.8	0.04	-0.65	1.13	15.42	0.75	0.78
1601	1	Flat	8	8.75	0.64	0.5	-0.2	-0.8	0.85	9.74	0.75	0.46	13.96	0.65	0.69	-0.49	-1.27	-0.13	16.26	0.75	0.69
1602	3	Flat	50	1.49	0.51	0.66	-0.91	-2.16	0.18	5.35	0.76	0.65	8.81	0.52	0.44	-0.47	-1.34	0.63	11.25	0.76	0.43
1603	3	Hill	40	2.34	0.81	0.79	-1.45	0.58	0.95	9.58	0.76	0.76	17.13	0.43	0.58	0.39	-2.5	0.32	15.1	0.75	0.57
1604	1	Flat	5	4.15	0.96	0.69	0.51	1.73	-0.47	2.6	0.77	0.71
1605	3	Hill	40	2.23	0.92	0.47	-0.1	0.97	-1.42	2.53	0.77	0.5	18.89	0.68	0.59	0.04	-0.83	0.72	18.72	0.75	0.57
1606	1	Flat	8	7.31	0.69	0.23	0.45	-0.39	0.3	5.37	0.77	0.23	9.17	0.71	0.59	0.87	-0.45	0.61	5.38	0.77	0.58
1607	1	Flat	9	6.51	0.77	0.76	-0.61	0.11	-0.13	9.48	0.76	0.76	9.14	0.87	0.53	0.9	0.66	0.22	5.33	0.77	0.52
1608	3	Hill	40	4.78	0.43	0.59	-0.94	-2.34	1.32	9.61	0.76	0.56	17.38	0.71	0.61	-0.52	-0.5	-0.36	19.61	0.75	0.62
1609	2	Flat	12	1.25	0.87	0.38	-0.44	0.5	0.32	2.61	0.78	0.38	15.81	0.72	0.69	0.33	-0.27	0.35	14.12	0.75	0.68
1701	3	Flat	60	1.42	0.8	0.83	-1.28	0.5	0.21	7.3	0.76	0.82	13.57	0.86	0.56	-0.8	1.21	-1	17.4	0.74	0.59
1702	2	Flat		1.17	0.44	0.44	-0.51	-1.9	0.37	2.79	0.77	0.43	18.8	0.75	0.59	1.19	0.09	-0.5	12.79	0.74	0.6
1703	3	Hill	40	2.71	0.87	0.47	-1.32	0.69	-1.43	9.37	0.76	0.5	16.62	0.81	0.64	0.26	0.64	0.15	15.32	0.75	0.63
1704	1	Flat	8	10.86	0.33	0.34	-0.1	-2.17	1.1	11.37	0.76	0.32	9.48	0.93	0.42	0.4	0.99	-0.77	7.6	0.77	0.45
1705	1	Flat	10	4.95	0.52	0.31	-0.95	-1.2	0.76	9.69	0.77	0.3	21.87	0.84	0.45	1.84	0.52	-1.38	12.72	0.76	0.48
1706	3	Flat	70	0.11	0.81	0.78	-0.85	0.53	-0.41	2.75	0.77	0.81	10.25	0.78	0.47	-0.49	0.26	-1.01	12.78	0.75	0.5
1707	3	Hill	30	4.08	0.78	0.71	-1.08	0.34	-1.54	9.42	0.76	0.76	17.27	0.81	0.59	0.21	0.56	-0.07	16.24	0.74	0.59
1708	1	Flat	6	10.36	0.7	0.3	0.08	-0.33	-0.47	9.96	0.76	0.31	4.91	0.8	0.62	-0.13	0.28	-0.31	5.47	0.76	0.63
1709	1	Flat	10										5.7	0.71	0.58	0.12	-0.38	-0.28	5.2	0.76	0.59
1801	3	Hill	40	3.82	0.8	0.71	-1.41	0.55	-0.48	10.88	0.76	0.72	8.94	0.54	0.51	-1.73	-1.53	1.46	17.21	0.75	0.47
1802	3	Hill	45	0.95	0.72	0.82	-1.05	-0.48	0.88	5.1	0.76	0.78	18.89	0.71	0.73	-0.34	-0.47	0.59	20.34	0.74	0.72
1803	3	Flat	60	1.72	0.52	0.62	-0.84	-1.71	1.24	5.32	0.76	0.59	15.9	0.64	0.71	0.33	-1.43	0.5	14.22	0.75	0.7
1804	3	Flat	30	9.9	0.83	0.86	-0.29	1.16	0.24	11.36	0.75	0.86	21.15	0.68	0.72	1.67	-0.83	0.42	12.68	0.75	0.71
1805	3	Flat	60	6.04	0.86	0.84	0.18	1.08	1.3	5.3	0.76	0.79	14.21	0.83	0.59	0.27	0.58	1.55	12.89	0.75	0.54
1806	3	Hill	60										10.25	0.68	0.73	-0.81	-1.04	-0.65	14.18	0.75	0.75
1807	3	Flat	50										15.19	0.86	0.61	0.26	0.97	-0.86	13.89	0.75	0.64
1808	3	Hill	40	3.8	0.83	0.65	0.36	0.62	-2.37	2.67	0.77	0.75	17.38	0.72	0.6	-0.14	-0.39	-1.03	18.03	0.75	0.62
1809	3	Flat	50	3.29	0.65	0.95	-0.46	-1.5	0.57	5.06	0.77	0.93	21.49	0.86	0.4	1.24	0.57	0.5	15.41	0.75	0.4
1901	3	Flat	30	2.86	0.55	0.29	0.05	-1.15	1.63	2.72	0.79	0.27	11.1	0.68	0.65	-0.62	-0.68	-0.05	14.2	0.75	0.65
1902	2	Hill	20										16.62	0.76	0.6	-0.49	0.23	0.81	18.91	0.74	0.58
1903	3	Flat	30	6.56	0.68	0.83	-0.24	-0.94	0.97	7.69	0.76	0.79	12.23	0.74	0.69	-1.3	0.01	-0.14	18.28	0.74	0.69
1904	1	Flat	8	4.02	0.98	0.16	-0.35	0.87	-0.38	5.54	0.77	0.16	1.61	0.71	0.64	-0.28	-0.51	-0.08	2.41	0.78	0.64
1905	2	Flat	12	1.23	0.65	0.78	-0.49	-1.18	0.77	2.77	0.77	0.75	15.6	0.78	0.66	0.83	0.27	-0.93	11.41	0.75	0.69
1906	1	Flat	9	8.16	0.82	0.84	-0.3	0.88	-0.19	9.63	0.76	0.84	15.99	0.69	0.49	1.31	-0.41	0.76	9.68	0.75	0.47
1907	2	Hill	20	2.19	0.75	0.88	-1.82	0.03	0.82	11.22	0.75	0.86	17.65	0.76	0.68	0.45	0.17	-0.7	15.39	0.75	0.7
1908	1	Flat	7	4.41	0.71	0.76	-0.67	-0.54	0.45	7.5	0.76	0.74	4.6	0.78	0.49	-0.2	0.09	0.42	5.47	0.76	0.49
1909	1	Flat	7	2.83	0.3	0.28	0.06	-2.32	1.01	2.65	0.78	0.27	8.75	0.86	0.39	0.21	0.59	-0.53	7.79	0.76	0.4
2001	2	Hill	25	6.89	0.71	0.65	-0.89	-0.36	0.34	11.33	0.75	0.64	24.63	0.81	0.57	1.3	0.61	-0.37	18.84	0.75	0.58
2002	1	Flat	5	2.5	0.25	0.29	-1.42	-2.47	1.64	9.59	0.76	0.28
2003	2	Flat	15	1.46	0.49	0.46	-0.91	-1.63	0.81	5.3	0.76	0.45	17.14	0.75	0.6	1.14	0.02	-0.5	11.36	0.75	0.62
2004	1	Flat	3	14.46	0.9	0.46	0.96	0.95	-1.3	9.75	0.76	0.5
2005	1	Flat	10										17.14	0.82	0.56	1.15	0.52	-0.44	11.34	0.75	0.58
2006	3	Hill	35	16.1	0.44	0.62	1.31	-2.69	0.99	9.68	0.76	0.58	17.33	0.7	0.69	0.59	-0.59	0.05	14.36	0.75	0.68
2007	3	Hill	35	1.61	0.6	0.48	-0.9	-0.91	-0.02	5.34	0.75	0.48	26.23	0.68	0.71	1.85	-0.92	0.22	17.45	0.75	0.7
2008	1	Flat	10	2.46	0.87	0.74	-1.12	1.08	0.81	7.82	0.76	0.71	4.14	0.51	0.77	-0.77	-1.9	3.49	7.73	0.75	0.63
2009	2	Flat	25	16.06	0.71	0.86	0.92	-0.65	-0.06	11.32	0.75	0.86	24.33	0.79	0.6	1.49	0.54	-0.41	17.37	0.74	0.61
2010	2	Hill	20	5.55	0.84	0.72	-0.8	0.97	-0.06	9.36	0.76	0.73	15.38	0.81	0.49	-0.81	0.4	-0.84	18.96	0.76	0.51
2011	3	Flat	40	0.15	0.63	0.75	-0.82	-1.32	0.51	2.65	0.77	0.73	18.75	0.56	0.58	0.65	-1.93	-0.28	15.45	0.75	0.59
2012	2	Flat	20	12.36	0.8	0.72	1.01	0.49	-1.57	7.65	0.76	0.79	20.03	0.84	0.56	0.53	0.93	-1.21	17.41	0.74	0.59
2101	3	Flat	30	2.18	0.86	0.68	-1.5	1.07	-1.36	9.47	0.76	0.73	14.42	0.79	0.61	-0.83	0.41	-0.67	18.23	0.75	0.63
2102	2	Flat	14	10.37	0.65	0.7	-0.71	-1.27	0.53	13.94	0.75	0.69	18.79	0.78	0.72	0.09	0.49	-0.53	18.36	0.74	0.73
2103	2	Flat	14										15.81	0.53	0.56	0.6	-1.7	0.25	12.71	0.75	0.55
2104	2	Hill	20	4.58	0.65	0.75	-0.98	-1.05	-0.08	9.4	0.75	0.75	15.59	0.64	0.68	-0.52	-1.23	1.09	18.07	0.75	0.65
2105	1	Flat	9	15.73	0.43	0.43	0.57	-2.03	0.63	12.86	0.77	0.42	17.78	0.63	0.65	-0.29	-1.37	-0.58	19.13	0.74	0.66
2106	2	Hill	20	5.23	0.7	0.53	-0.91	-0.34	0.95	9.8	0.76	0.5	20.95	0.63	0.62	0.27	-1.42	0.05	19.78	0.75	0.62
2107	3	Hill	40	5.16	0.72	0.86	-1.19	-0.4	1.58	11.02	0.75	0.81	17.38	0.58	0.52	-0.35	-1.54	-0.06	18.93	0.75	0.53
2108	3	Flat	40	2.51	0.64	0.82	-1.73	-1.25	1.59	11.32	0.75	0.77	14.7	0.77	0.72	-0.57	0.38	-0.1	17.31	0.75	0.72
2109	3	Flat	35	4.32	0.69	0.68	-1.67	-0.68	0.58	12.91	0.75	0.67	15.56	0.59	0.73	-0.19	-1.95	0.74	16.5	0.75	0.71
2201	1	Flat	8	13.05	0.49	0.47	0.35	-1.66	0.35	11.35	0.76	0.46	8.25	0.69	0.65	0.12	-0.67	-0.07	7.68	0.76	0.65
2202	1	Flat	8	17.45	0.49	0.51	2.2	-1.88	0.06	7.51	0.76	0.5	9.76	0.64	0.62	0.02	-1.09	-0.37	9.68	0.76	0.63
2203	2	Flat	20										11.35	0.76	0.73	-0.3	0.1	0.23	12.87	0.75	0.72
2204	1	Flat	7
2205	1	Flat	7
2206	1	Flat	10	9.08	0.7	0.38	-1.01	-0.29	-0.06	14.22	0.75	0.39	20.82	0.63	0.6	1.15	-0.99	0.06	15.24	0.74	0.6
2207	1	Flat	7	8.18	0.29	0.12	0.69	-1.93	1	5.33	0.77	0.12	7.31	0.89	0.77	1.56	1.26	0.6	2.54	0.77	0.75
2208	1	Flat	10	11.25	0.77	0.65	-0.81	0.3	-0.07	15.26	0.75	0.65	14.84	0.47	0.66	0.69	-2.66	1	11.36	0.75	0.63
2209	1	Flat	7	14.41	0.58	0.47	0.08	-1.34	0.32	14.04	0.76	0.45
2301	3	Flat	50	8.61	0.86	0.5	-1.13	0.72	-0.31	14.4	0.75	0.51	17.04	0.77	0.63	0.15	0.27	-0.37	16.27	0.75	0.64
2302	3	Hill	50	2.75	0.83	0.72	-1.02	0.71	0.08	7.49	0.76	0.72	17.4	0.83	0.65	-0.19	0.97	-1.73	18.26	0.74	0.68
2303	3	Flat	60	4.98	0.8	0.84	-1.2	0.7	1.19	11.16	0.75	0.8	17.21	0.77	0.68	-0.03	0.32	-0.51	17.36	0.74	0.69
2304	2	Flat	15	9.17	0.47	0.35	0.99	-1.5	-0.2	5.12	0.77	0.35	18.8	0.66	0.62	0.48	-0.7	1.38	16.45	0.75	0.58
2305	2	Flat	15										22.88	0.75	0.66	1.69	0.04	-1.06	14.12	0.75	0.69
2306	2	Flat	15	6.03	0.66	0.71	-0.34	-1.07	0.12	7.64	0.76	0.7	10.27	0.85	0.66	-1.01	0.97	-0.89	15.26	0.75	0.68
2307	2	Flat	15	7.15	0.61	0.6	-0.49	-1.11	0.75	9.69	0.76	0.58	17.23	0.63	0.6	0.34	-1.19	0.12	15.55	0.75	0.59
2308	3	Hill	30	5.39	0.69	0.65	-1.51	-0.6	-0.41	12.79	0.75	0.66	18.85	0.66	0.72	-0.82	-1.31	-0.73	22.03	0.74	0.73
2309	3	Flat	60	6.29	0.83	0.71	-0.67	0.74	-0.02	9.58	0.76	0.71	17.81	0.67	0.59	0.52	-0.6	-0.11	15.28	0.74	0.59
3010	2	Hill	20	9.6	0.87	0.75	0.02	1.22	0.1	9.5	0.75	0.75	6.57	0.7	0.7	-0.95	-0.59	-0.16	11.52	0.75	0.7
3011	1	Flat	10										12.79	0.65	0.67	0.6	-1.09	0.48	9.67	0.76	0.66
3012	1	Flat	8	4.53	0.98	0.16	0.57	0.83	-0.76	2.7	0.78	0.16	10.38	0.74	0.71	-0.77	-0.12	1.28	14.1	0.75	0.67
4010	3	Hill	50	7.23	0.72	0.93	0.48	-0.54	-0.09	5.34	0.76	0.93	13.95	0.71	0.75	-1.37	-0.6	-0.09	19.77	0.75	0.76
4011	3	Flat	50	1.64	0.82	0.64	-0.86	0.42	-0.41	5.31	0.77	0.65	17.39	0.7	0.43	0.89	-0.38	-0.28	12.88	0.76	0.43
4012	3	Flat	50	0.26	0.74	0.73	-1.21	-0.13	0.27	5.16	0.75	0.71	17.7	0.79	0.66	0.46	0.45	1.19	15.49	0.75	0.63
5010	1	Flat	10	5.49	0.87	0.5	-2.32	0.76	0.56	16.47	0.75	0.49	23.38	0.67	0.62	1.44	-0.86	0.48	16.37	0.75	0.61
5011	1	Flat	8	10.21	0.64	0.58	-0.78	-1.02	0	14.15	0.76	0.58	13.86	0.84	0.69	1.37	0.77	-0.16	7.55	0.76	0.69
5012	1	Flat	6	12.35	0.81	0.77	0.21	0.59	0.24	11.28	0.75	0.76	1.24	0.83	0.3	-0.47	0.23	0.22	2.55	0.78	0.3
6010	1	Flat	10	8.89	0.6	0.58	-1.09	-1.49	0.19	14.22	0.75	0.58	15.74	0.8	0.85	0.59	0.78	1.36	12.74	0.75	0.82
6011	2	Hill	13	11.91	0.63	0.52	-0.44	-0.82	0.61	14.13	0.75	0.51	20.4	0.79	0.67	0.37	0.64	1.05	18.71	0.74	0.66
6012	2	Flat	13										12.59	0.79	0.67	-0.07	0.44	0.02	12.93	0.75	0.67
7010	2	Flat	16	2.27	0.83	0.83	-1.79	0.99	2.17	11.19	0.76	0.76	14.01	0.73	0.6	-1.38	-0.11	-0.01	19.82	0.74	0.6
7011	3	Flat	40	7.74	0.94	0.71	0.05	1.66	-0.28	7.48	0.76	0.71	7.1	0.7	0.51	-0.86	-0.37	1.02	11.32	0.76	0.49
7012	1	Flat	6	23.04	0.57	0.68	1.56	-1.76	2.37	15.62	0.75	0.62	7.76	0.67	0.76	0.06	-0.99	-0.25	7.45	0.75	0.77
8010	2	Flat	20	1.99	0.86	0.35	-0.79	0.48	-0.89	5.47	0.76	0.36	2.11	0.8	0.78	-0.13	0.3	-0.81	2.5	0.78	0.81
8011	1	Flat	4	11.77	0.79	0.61	-1.45	0.58	-0.8	18.32	0.74	0.63	9.19	0.96	0.45	-0.04	1.33	0.17	9.4	0.76	0.45
8012	1	Flat	8	14.23	0.53	0.58	-0.64	-1.57	0.99	17.27	0.75	0.56	22.43	0.69	0.73	1.95	-0.68	1.2	12.76	0.75	0.69
9010	2	Flat	14	3.12	0.61	0.42	-0.5	-0.94	0.9	5.2	0.78	0.4	10.75	0.84	0.61	-0.43	0.83	0.93	12.93	0.75	0.59
9011	1	Flat	10	3.88	0.94	0.33	-0.33	0.85	-0.82	5.29	0.77	0.34	23.45	0.8	0.36	1.36	0.3	0.13	17.14	0.74	0.36
9012	2	Flat	20										6.98	0.84	0.64	-0.54	0.77	0.45	9.68	0.76	0.63
10010	2	Flat	20	4.06	0.74	0.58	-1.41	-0.1	-0.35	11.14	0.76	0.59	22.11	0.7	0.68	0.73	-0.59	0.53	18.83	0.75	0.67
10011	1	Flat	7	6.51	0.78	0.64	-0.64	0.16	-0.39	9.66	0.76	0.65	7.34	0.8	0.61	-0.47	0.36	0.31	9.63	0.76	0.6
10012	2	Flat	25	6.14	0.51	0.43	-0.99	-1.44	-0.14	11.16	0.76	0.43	14.37	0.6	0.69	-0.62	-1.77	0.43	17.37	0.75	0.68
11010	1	Flat	10	17.45	0.31	0.32	2.95	-2.31	1.37	5.17	0.77	0.31	17.75	0.71	0.55	0.9	-0.34	-0.54	13.05	0.75	0.56
11011	1	Flat	10	1.88	0.85	0.22	-1.25	0.34	-0.05	7.88	0.77	0.22	9.51	0.85	0.59	-0.67	0.9	-0.7	12.9	0.75	0.61
11012	1	Flat	9	7.49	0.49	0.17	-0.06	-1.17	1.4	7.79	0.77	0.17	8.78	0.74	0.67	-0.18	-0.1	-0.39	9.68	0.75	0.68
12010	2	Flat	15										6.08	0.71	0.69	-1.04	-0.51	-0.83	11.35	0.75	0.71
12011	3	Flat	35	2.06	0.63	0.85	-0.19	-1.63	0.89	2.67	0.77	0.8	10.67	0.61	0.66	-1.51	-1.54	-0.18	17.67	0.75	0.66
12012	3	Flat	40										12.28	0.8	0.84	1.01	0.57	0.59	7.55	0.75	0.82
13010	1	Flat	10	7.9	0.48	0.44	-0.36	-1.81	-0.06	9.73	0.77	0.44	11.55	0.84	0.73	-0.49	1.15	-0.91	14	0.75	0.75
13011	2	Flat	25	5.1	0.75	0.53	-0.06	-0.09	1.17	5.35	0.76	0.5	17.5	0.91	0.57	-0.35	1.81	-1.13	19.09	0.75	0.6
13012	2	Hill	16	16.11	0.78	0.58	-0.05	0.26	1.2	16.37	0.75	0.55	14.59	0.77	0.58	0.64	0.07	0.26	11.32	0.76	0.57
14010	1	Flat	6	17.45	0.42	0.41	1.61	-1.89	0.45	9.63	0.76	0.4	3.02	0.81	0.71	0.21	0.42	-1.01	2.43	0.77	0.75
14011	1	Flat	9	16.15	0.48	0.51	0.72	-1.78	0.23	12.7	0.75	0.5	21.98	0.84	0.56	1.6	0.72	0.36	14.07	0.75	0.55
14012	1	Flat	6	1.82	0.69	0.22	-0.84	-0.38	1.2	5.39	0.77	0.21	13.71	0.81	0.59	-0.09	0.51	-0.51	14.19	0.76	0.61
15010	2	Flat	25	1.49	0.66	0.77	-1.33	-1.22	-1.18	7.54	0.76	0.81	18.98	0.84	0.71	0.15	1.26	0.06	18.27	0.75	0.71
15011	1	Flat	6	8.61	0.47	0.18	-0.85	-1.31	0.47	12.91	0.77	0.17	4.71	0.69	0.75	-0.99	-0.72	-0.39	9.56	0.75	0.76
15012	1	Flat	10	14.06	0.41	0.39	2.03	-1.84	1.69	5.38	0.76	0.37	14.3	0.59	0.68	0.54	-1.65	0.25	11.5	0.75	0.67
16010	3	Flat	50										19.07	0.57	0.6	0.35	-1.63	0.06	17.39	0.75	0.6
16011	1	Flat	10	6.08	0.7	0.29	-0.37	-0.3	-0.27	7.95	0.77	0.29	10.78	0.74	0.6	0.68	-0.15	-1.98	7.62	0.76	0.66
16012	3	Flat	60										14.3	0.79	0.55	0.24	0.37	-0.97	13.05	0.75	0.58
17010	3	Hill	40	4.58	0.66	0.66	-0.98	-0.87	-0.62	9.28	0.76	0.68	17.38	0.77	0.72	0.93	0.2	-0.58	12.63	0.75	0.74
17011	3	Flat	35										14.14	0.91	0.49	0.92	1.2	-0.64	9.55	0.75	0.52
17012	1	Flat	8	6.28	0.56	0.27	-0.27	-1.08	1.13	7.6	0.78	0.26	10.85	0.57	0.6	0.21	-1.54	0.58	9.8	0.75	0.58
18010	3	Flat	60	4.68	0.71	0.88	-1.36	-0.72	1.06	11.24	0.76	0.86	12.76	0.8	0.6	-0.78	0.45	0.42	16.42	0.75	0.59
18011	3	Flat	60	2.1	0.97	0.8	-0.79	2.22	0.05	5.22	0.77	0.8	15.05	0.69	0.82	-0.02	-0.99	-0.28	15.16	0.75	0.83
18012	3	Flat	40										10.57	0.59	0.58	-0.95	-1.58	0.23	15.12	0.74	0.58
19010	1	Flat	10	5.8	0.56	0.74	-1.1	-1.94	0.71	11.26	0.75	0.72	7.87	0.94	0.6	-0.02	1.45	-0.7	7.98	0.76	0.62
19011	2	Hill	25										22.71	0.46	0.53	1.13	-2.01	0.6	17.33	0.75	0.52
19012	3	Flat	40										10.33	0.44	0.48	-1.26	-2.07	0.81	16.46	0.76	0.46
20010	3	Flat	40										21.5	0.77	0.8	0.77	0.55	0.02	17.99	0.74	0.8
20011	3	Flat	30										6.69	0.79	0.73	-0.57	0.32	-0.4	9.57	0.76	0.74
20012	1	Flat	6	3.25	0.72	0.16	-0.49	-0.19	1	5.3	0.77	0.16
21010	2	Flat	20	4.02	0.91	0.39	-0.73	0.82	-1.53	7.38	0.76	0.42	18.59	0.7	0.64	0.49	-0.56	0.35	16.16	0.75	0.63
21011	1	Flat	8	0.05	0.98	0.08	-0.84	0.71	-0.1	2.68	0.79	0.08	19.7	0.85	0.68	0.66	1.27	-1.14	16.44	0.75	0.71
21012	3	Flat	30	7.54	0.77	0.71	-1.04	0.24	0.81	12.82	0.75	0.68	12.76	0.87	0.55	-0.9	1.27	-0.66	17.17	0.75	0.56
22010	1	Flat	10	9.21	0.77	0.72	-0.42	0.18	0.93	11.3	0.75	0.69	15.01	0.79	0.79	1.63	0.37	0.01	7.45	0.76	0.79
22011	2	Flat	11	17.51	0.8	0.67	0.06	0.71	-0.11	17.22	0.74	0.67	16.02	0.93	0.5	0.9	1.4	-0.46	11.33	0.75	0.51
22012	2	Flat	12	7.3	0.64	0.5	-1.09	-0.96	-0.75	12.85	0.76	0.52	8.52	0.93	0.41	-0.23	0.98	-1.08	9.7	0.76	0.42
23010	3	Hill	30	3.5	0.72	0.73	-1.19	-0.27	0.22	9.4	0.75	0.72	17.38	0.91	0.6	0.03	1.76	-2.06	17.25	0.75	0.64
23011	3	Flat	35	0.11	0.73	0.74	-0.81	-0.53	-0.35	2.67	0.78	0.75	18.82	0.66	0.71	0.66	-1.05	1.26	15.5	0.75	0.68
23012	3	Hill	40	4.86	0.67	0.77	-2.04	-1.1	0.91	15.22	0.75	0.74	15.68	0.69	0.73	-0.53	-0.78	1.67	18.14	0.75	0.69

## Sheet: Table S4
Table S4 Abundance of small trees
	ACAGAU	ACAPEN	BAUUNG	BOUPUL	BURSIM	CAEGAU	CALPAL	CHLMAN	COCACA	COCSPI	COCVIT	CROREF	DIOANI	DIOTET	DIOYUC	ERYROT	EUGAXI	EUGBUX	EXOCAR	GUEELL	GYMFLO	HELDON	JATGAU	KARHUM	LEULEU	LONRUG	LONXUL	LUESPE	LYSLAT	MACLIN	MALGLA	MIMBAH	NEEPSY	NEOEMA	PISPIS	PLAYUC	PSISAR	SEMMEX	SENATO	SENRAC	SIDOBT	TABCHR	TALOLI	THOPAU	VITGAU
101	0	0	0	0	0	0	0	0	0	0	0	0	1	0	0	0	0	0	0	0	1	0	0	0	0	0	0	0	0	0	1	0	0	0	2	0	0	0	0	0	0	0	0	0	0
102	0	0	0	0	0	0	0	0	0	0	0	0	0	0	0	0	0	0	0	0	2	0	0	0	0	0	0	0	0	0	1	2	0	14	0	0	0	0	0	0	0	0	0	0	0
103	2	0	0	0	0	0	0	0	0	0	0	0	0	0	1	1	0	1	0	0	3	0	0	0	0	0	0	0	0	0	6	0	0	0	0	0	0	0	0	0	0	0	0	0	0
104	1	0	0	0	2	0	0	0	0	0	0	0	5	0	0	0	0	3	1	0	2	0	0	0	0	0	0	0	0	1	3	0	3	0	0	0	0	0	0	0	0	0	0	0	0
105	0	0	0	0	0	0	0	0	0	0	0	0	0	0	0	0	0	0	0	0	5	0	0	0	0	0	2	0	0	1	0	0	5	0	0	0	0	0	0	0	0	0	0	0	0
106	0	0	0	0	0	0	0	0	0	0	0	0	2	0	0	0	0	2	0	0	0	0	0	0	0	0	0	0	0	0	0	0	2	0	0	0	0	0	0	0	0	0	0	1	0
107	1	0	0	0	0	0	0	0	0	0	0	0	1	0	0	0	0	0	1	0	0	0	0	0	0	0	0	0	0	0	0	0	2	15	0	0	0	0	0	0	0	0	0	0	0
108	1	0	0	0	0	0	0	0	0	0	0	0	0	0	0	0	0	0	0	0	1	0	0	0	0	0	0	0	0	0	1	0	0	33	3	0	0	0	0	0	0	0	0	0	0
109	2	0	0	0	0	0	0	0	0	0	0	0	0	0	0	0	0	0	0	0	1	1	0	0	0	0	0	0	0	0	1	0	0	3	0	0	0	0	0	0	0	0	0	0	0
201	0	0	0	0	1	0	0	0	0	0	0	0	0	0	1	0	0	0	0	0	2	0	0	0	0	0	0	0	0	6	0	0	0	10	0	0	0	0	0	0	0	0	0	1	0
202	0	0	1	0	1	1	0	0	0	0	0	0	0	0	0	0	1	0	0	0	0	0	0	0	0	0	0	0	0	0	0	0	0	0	0	0	1	0	0	0	0	0	0	0	0
203	2	0	0	0	0	0	0	0	0	0	0	0	5	0	0	0	1	1	0	0	0	0	0	0	0	0	1	0	0	0	0	0	2	0	0	0	0	0	0	0	0	0	0	2	0
204	0	0	0	0	0	0	0	0	0	0	0	0	0	0	0	0	0	0	0	0	0	0	0	0	0	0	0	0	0	0	0	0	0	13	0	0	0	0	0	0	0	0	0	0	0
205	0	0	0	0	0	0	0	0	0	0	0	0	0	0	0	0	0	0	0	0	0	0	0	0	0	0	0	0	0	0	0	0	0	23	0	0	0	0	0	0	0	0	0	0	0
206	0	0	0	0	0	0	0	0	0	0	0	0	0	0	0	0	1	0	0	0	7	0	0	0	0	0	0	0	0	0	0	0	0	0	0	0	0	0	0	0	0	0	0	0	0
207	0	0	6	0	0	3	0	0	0	0	0	0	0	0	0	0	0	0	0	0	0	0	0	0	0	0	0	0	0	0	0	1	0	10	0	0	4	0	0	0	0	0	0	0	0
208	0	0	0	0	0	2	0	0	0	0	0	0	0	0	0	0	0	0	0	0	0	0	0	0	0	0	0	0	0	0	0	1	0	64	0	0	0	0	0	0	0	0	0	0	0
209	0	0	0	0	0	0	0	0	0	0	0	0	4	4	0	0	2	0	0	0	0	0	0	0	0	0	7	0	0	0	0	0	2	0	0	0	0	0	0	0	1	0	0	0	0
301	0	0	0	0	0	0	0	0	0	0	0	0	0	0	0	0	0	0	0	0	2	0	0	0	0	0	0	0	0	0	0	0	0	52	0	0	0	0	0	0	0	0	0	0	0
302	0	0	0	0	0	0	0	0	0	0	0	0	0	0	0	0	0	0	0	0	1	0	0	0	0	0	0	0	0	0	0	1	0	22	0	0	0	0	0	0	0	0	0	0	0
303	0	0	0	0	1	0	0	0	0	0	0	0	0	11	1	0	3	0	0	0	0	0	0	0	1	0	0	0	0	0	0	0	1	0	0	0	0	0	0	0	0	0	0	0	0
304	0	1	0	0	3	0	0	0	0	0	0	3	1	12	0	0	0	0	0	0	0	0	0	0	4	0	10	0	1	0	0	2	4	3	1	0	0	0	0	1	0	0	0	0	0
305	1	0	2	0	1	0	0	0	0	0	0	0	0	0	0	0	1	0	0	0	0	0	0	0	0	0	0	1	0	0	0	3	0	4	0	0	1	0	0	0	0	0	0	0	0
306	0	0	0	0	0	0	0	0	0	0	0	3	0	0	0	0	4	0	0	0	0	0	0	0	0	0	1	0	0	1	0	0	0	0	0	1	0	0	0	0	0	0	0	2	0
307	0	0	4	0	0	0	0	0	0	0	0	0	0	0	0	0	4	0	0	0	0	0	0	0	0	16	0	0	0	0	0	2	0	0	0	0	2	0	0	0	0	0	0	0	0
308	1	0	0	0	1	0	0	0	0	0	0	0	0	0	2	1	1	0	0	0	2	0	0	0	0	0	1	0	0	0	5	0	2	0	0	0	0	1	0	0	0	0	0	1	1
309	0	0	0	0	0	0	0	0	0	0	0	2	0	0	2	0	1	0	0	0	0	0	0	0	0	0	3	0	0	0	0	0	1	0	1	0	1	0	0	0	0	0	0	0	0
401	0	0	0	0	0	0	0	0	1	0	0	2	0	0	0	0	3	0	0	0	0	1	0	0	0	0	0	1	0	0	0	0	0	0	0	0	4	0	0	0	0	0	0	0	0
402	0	0	0	0	0	0	0	0	1	0	0	0	1	0	0	0	0	0	0	0	7	0	0	0	0	0	0	0	0	0	1	0	1	0	0	0	0	0	0	0	0	0	0	0	0
403	0	0	0	0	0	0	0	0	0	0	0	0	0	0	1	0	0	0	4	0	0	0	0	0	0	0	2	0	0	0	0	0	1	2	0	0	0	0	0	0	0	0	0	0	0
404	0	0	0	0	0	0	0	0	2	0	0	0	0	0	0	0	0	0	2	0	4	0	0	0	0	0	0	0	0	0	0	0	0	4	0	0	1	0	0	0	0	0	0	0	0
405	0	0	0	0	0	0	0	0	0	0	0	0	0	0	0	0	4	0	0	0	3	0	0	0	0	0	0	0	0	0	1	0	2	2	0	0	0	0	0	0	0	0	0	0	0
406	0	0	3	0	0	0	0	0	2	0	0	0	2	0	0	1	1	0	0	0	1	0	0	0	0	0	0	0	0	0	0	3	0	1	0	0	1	0	0	0	0	0	0	0	0
407	0	0	0	0	0	0	0	0	0	0	0	0	4	1	2	0	0	0	0	0	0	0	0	0	0	0	5	0	0	1	1	0	1	7	0	0	0	0	0	0	0	0	0	0	0
408	0	0	0	0	0	0	0	2	0	0	0	0	0	0	0	0	0	0	1	0	0	0	0	0	0	0	0	0	0	0	0	0	0	0	0	0	0	0	0	0	0	0	0	0	0
409	2	0	0	0	0	0	0	0	0	0	0	0	0	0	0	0	0	3	0	1	10	0	0	0	0	0	0	0	0	0	0	0	0	1	0	0	0	0	0	0	0	0	0	0	0
501	1	0	0	0	0	0	0	0	0	0	0	0	1	1	0	0	0	0	1	0	1	0	0	0	0	0	0	0	0	0	0	0	0	0	0	0	0	0	0	0	0	0	0	0	0
502	2	0	0	0	0	0	0	0	1	0	0	3	2	0	0	0	0	0	0	0	1	0	0	0	0	0	1	0	0	0	0	0	0	2	0	0	0	0	0	0	0	0	1	0	0
503	0	0	0	0	1	0	0	0	0	0	0	2	3	0	0	0	0	0	0	0	0	0	0	0	0	0	34	0	0	0	0	1	1	12	0	0	0	10	0	0	0	0	0	0	0
504	0	0	0	1	0	0	0	0	0	4	0	10	1	5	1	0	1	0	0	0	0	0	0	0	0	0	9	0	0	0	0	1	0	14	0	0	0	6	0	1	0	0	0	2	0
505	0	0	6	0	7	0	0	0	0	3	0	0	0	4	18	0	0	0	1	1	0	0	0	0	0	0	8	0	0	4	0	3	0	0	1	0	0	0	0	1	1	0	0	0	0
506	0	0	0	0	0	0	0	0	0	0	0	0	1	0	1	0	0	0	0	0	16	0	0	0	0	0	8	0	1	3	0	0	2	2	0	0	0	2	0	0	0	0	0	2	0
507	1	0	0	0	0	0	0	0	0	0	0	0	2	2	0	0	1	0	0	0	4	0	0	0	0	0	6	0	0	0	0	0	1	5	0	0	0	0	0	0	0	0	0	3	0
508	1	0	0	0	0	0	0	0	0	0	0	1	0	0	1	0	1	0	0	0	0	0	0	0	0	0	0	0	0	0	0	0	0	0	0	0	0	0	0	0	0	0	1	2	0
509	0	0	0	0	1	0	0	0	0	0	0	0	7	1	0	0	2	1	4	0	2	0	0	0	0	0	2	0	0	4	0	2	0	5	0	0	0	0	0	0	0	0	0	2	0
601	0	0	0	0	1	1	0	0	0	0	2	1	0	0	0	0	0	0	0	0	1	1	0	0	0	0	0	0	0	0	0	0	0	19	0	0	0	0	0	0	0	0	0	0	0
602	0	0	2	0	0	0	0	0	0	0	0	1	0	0	0	0	0	0	0	0	0	0	0	0	0	0	0	0	0	0	0	2	0	30	0	0	0	0	0	0	0	0	0	0	1
603	0	0	0	0	0	0	0	0	0	0	0	0	0	0	0	0	5	0	1	0	0	0	0	0	0	0	0	0	0	0	0	0	0	1	0	0	0	0	0	0	0	0	0	0	0
604	0	0	0	0	0	0	1	0	0	0	0	0	1	5	0	0	0	0	16	0	2	0	0	0	0	1	1	0	0	0	0	0	2	0	0	0	0	0	0	0	0	0	0	0	0
605	0	0	0	0	0	0	1	0	0	2	0	5	0	1	2	0	2	0	0	0	0	0	0	0	0	0	0	0	0	0	0	2	1	9	1	0	0	0	0	0	0	0	0	1	1
606	0	0	0	0	1	0	1	2	0	3	0	5	0	0	1	0	3	1	0	0	0	0	0	0	0	2	1	0	0	0	0	0	1	0	0	0	0	0	0	0	0	0	0	0	0
607	0	0	0	0	0	8	0	0	0	0	0	0	0	0	0	0	0	0	0	1	0	0	0	0	0	0	0	0	0	0	0	1	0	0	0	0	12	0	0	0	0	0	0	0	0
608	0	0	0	0	0	0	0	0	0	0	0	0	3	1	0	0	0	0	0	0	0	0	0	0	0	0	1	0	0	0	0	1	0	10	0	0	0	0	0	0	0	0	0	1	1
609	0	0	0	0	1	0	2	0	0	0	0	3	0	3	2	0	3	0	2	0	0	0	0	0	0	0	6	0	0	0	0	0	1	0	0	0	0	0	0	0	0	0	0	3	0
701	0	0	0	0	0	0	0	0	0	0	0	0	3	0	0	0	6	0	4	0	2	0	0	0	0	0	11	0	0	0	0	0	2	0	0	0	0	0	0	0	0	0	0	3	0
702	2	0	0	0	0	0	0	0	0	0	0	0	1	0	0	0	0	0	0	0	4	0	0	0	0	0	0	0	0	0	0	0	2	0	0	0	0	0	0	0	0	0	0	2	0
703	0	0	0	0	0	0	0	0	0	0	0	0	0	0	1	0	0	0	0	0	9	0	0	0	0	0	0	0	0	0	0	7	0	20	3	0	0	0	0	0	0	0	0	0	0
704	0	0	0	0	0	0	0	0	0	0	0	0	0	0	0	0	0	0	0	0	0	0	0	0	0	0	0	0	0	0	0	0	0	16	1	0	0	0	0	0	0	0	0	0	0
705	0	0	0	0	0	0	0	0	0	0	0	0	5	4	1	0	0	3	0	0	0	0	0	0	0	0	0	0	0	2	0	0	6	6	0	0	0	0	0	0	0	0	0	3	0
706	0	0	0	0	1	0	0	0	0	0	0	0	0	3	0	0	0	0	0	0	2	1	0	0	3	0	0	0	1	0	1	3	1	0	0	0	0	0	0	0	0	0	0	2	1
707	1	0	0	0	0	0	0	0	0	0	0	0	4	0	1	0	0	0	2	1	0	0	0	0	0	0	4	0	0	0	0	0	0	25	0	0	0	0	0	0	0	1	0	0	0
708	0	0	0	0	0	0	0	0	0	0	0	0	3	1	0	0	0	1	1	0	14	0	0	0	0	0	15	0	0	0	4	0	1	5	0	0	0	0	0	0	1	0	0	0	0
709	0	0	0	0	0	0	0	0	0	0	0	0	4	0	0	0	0	1	0	2	1	0	0	0	0	0	0	0	0	3	0	1	0	7	0	0	0	0	0	0	0	1	0	0	0
801	0	0	0	1	0	1	0	0	0	0	2	0	1	1	1	0	0	0	0	5	0	0	0	0	1	0	0	0	0	0	0	2	0	24	0	0	1	0	0	0	0	0	0	0	0
802	0	0	0	1	1	0	0	0	0	0	0	0	10	0	0	0	0	0	0	1	0	0	0	0	0	0	3	0	1	4	0	0	4	15	0	0	0	0	0	0	0	0	0	0	0
803	0	0	0	0	1	0	6	0	0	0	0	0	0	0	0	0	1	0	0	0	0	0	0	0	0	0	0	1	0	0	0	0	0	1	0	0	8	0	0	0	0	0	0	0	0
804	0	0	0	0	0	0	2	0	0	0	0	0	0	0	1	0	0	1	0	1	0	0	0	0	0	0	4	0	0	0	0	0	0	0	1	0	0	2	0	0	0	0	0	0	0
805	2	0	0	0	0	1	1	0	0	0	0	0	13	6	0	0	0	0	1	1	6	0	0	0	0	0	1	0	0	0	0	0	0	1	0	0	0	0	0	0	1	0	0	1	0
806	0	0	0	0	0	0	0	0	0	0	0	0	0	0	0	0	0	0	0	0	0	0	0	0	0	11	0	0	0	0	0	0	0	0	2	0	0	0	0	0	0	0	0	0	0
807	0	0	8	0	0	0	0	0	0	0	0	0	0	0	0	0	0	0	0	0	0	0	0	0	1	3	0	0	0	0	0	0	0	0	0	0	0	0	0	0	0	0	0	0	0
808	0	0	0	0	0	0	0	0	0	0	0	0	0	0	0	0	0	0	1	0	10	0	0	0	0	0	0	0	0	0	0	0	0	0	0	0	0	0	0	0	0	0	0	0	0
809	0	0	0	0	0	0	5	0	0	0	0	0	4	1	3	0	0	0	1	0	4	0	0	0	0	0	0	0	2	0	0	1	0	0	0	0	0	0	0	0	0	0	0	0	0
901	0	0	0	0	0	0	0	0	0	3	0	0	0	0	0	0	3	0	0	0	0	0	0	0	0	0	0	0	0	0	0	2	0	15	0	0	0	2	0	0	0	0	0	0	0
902	0	0	0	0	0	0	0	0	0	0	0	0	0	0	0	0	2	0	0	0	0	0	0	0	0	0	1	0	0	0	0	0	0	0	0	0	0	10	0	0	0	0	0	0	0
903	0	0	0	0	0	0	2	0	0	0	0	0	0	2	0	0	0	0	0	0	0	0	0	0	0	0	7	0	0	0	0	0	0	0	0	0	0	0	0	0	0	0	0	0	0
904	0	0	0	0	0	0	13	0	0	0	0	25	0	0	0	0	6	0	0	0	0	0	0	0	0	0	0	0	2	0	0	1	0	8	2	0	0	0	0	0	0	0	0	0	0
905	0	0	0	0	1	0	1	0	0	0	0	6	0	2	0	0	0	0	0	0	0	0	0	0	0	0	0	0	0	0	0	0	0	0	0	0	0	1	0	0	0	0	0	0	0
906	0	0	0	0	1	0	5	0	0	0	0	0	0	0	0	0	9	0	0	0	0	0	0	0	0	0	0	0	0	0	0	0	0	0	0	0	1	0	0	0	0	0	0	0	0
907	0	0	0	0	0	0	1	0	0	0	0	1	0	0	0	0	0	0	0	0	0	0	0	0	0	0	3	0	0	0	0	0	0	3	0	0	0	0	0	0	0	0	0	0	0
908	0	0	0	0	0	0	2	0	0	0	0	0	0	1	0	0	3	0	0	0	0	0	0	0	0	0	3	0	0	0	0	0	1	0	0	0	0	0	0	0	0	0	0	0	0
909	0	0	1	0	1	0	0	0	0	0	0	0	0	0	0	0	0	0	0	0	0	0	0	0	0	0	0	0	0	0	0	0	0	15	0	0	1	0	0	0	0	0	0	0	0
1001	1	0	0	0	0	0	0	0	0	0	0	0	0	1	3	1	0	0	1	0	0	0	0	0	0	0	20	0	0	1	0	0	3	0	0	0	0	1	0	1	1	0	0	0	0
1002	0	0	0	0	0	1	0	0	0	0	0	0	0	0	0	0	0	0	0	0	0	0	0	0	0	0	0	0	0	2	1	0	1	22	1	0	0	0	0	0	0	0	0	0	0
1003	0	0	0	0	0	0	0	0	0	0	0	3	4	3	0	0	0	0	2	0	0	0	0	0	0	0	7	0	0	3	0	1	0	6	2	0	0	0	0	0	0	1	1	0	0
1004	2	0	0	0	0	0	0	0	0	0	0	0	0	4	0	0	0	0	3	0	2	0	0	0	0	0	1	0	0	0	0	0	2	2	0	0	0	1	0	0	0	0	0	2	0
1005	0	1	0	0	0	0	0	0	0	0	4	0	0	0	0	0	0	0	0	0	1	0	0	0	0	0	0	0	0	0	0	12	0	3	0	0	0	0	0	0	0	0	0	0	0
1006	0	0	0	1	0	0	0	0	0	0	0	0	1	0	3	0	0	2	0	0	3	0	0	0	0	0	1	0	0	0	0	0	0	5	0	0	0	0	0	0	0	0	0	0	0
1007	0	0	0	0	0	0	0	0	0	0	0	0	3	1	1	1	0	1	0	0	1	0	0	0	0	0	2	0	0	5	0	0	4	4	0	0	0	0	0	0	0	0	0	0	0
1008	0	0	0	0	0	1	0	0	0	0	0	0	0	0	1	0	0	0	0	0	0	0	0	0	0	1	0	0	0	0	0	0	0	12	0	0	2	0	0	0	0	0	0	0	0
1009	0	0	0	0	0	0	0	0	0	0	0	0	2	0	0	0	0	0	0	0	0	3	0	0	3	0	2	0	0	0	0	1	0	29	0	0	0	0	0	0	0	0	0	0	0
1010	0	0	0	0	0	0	0	2	0	0	0	0	0	0	0	1	0	0	0	0	6	0	0	0	0	0	0	0	0	0	0	0	0	1	0	0	0	0	0	0	0	0	0	0	0
1011	0	0	1	0	1	1	0	0	0	0	0	0	0	0	0	0	0	0	0	1	2	0	0	0	0	0	0	0	0	0	0	1	0	32	0	0	0	0	0	0	0	0	0	0	0
1012	0	0	0	0	0	2	0	0	0	0	0	0	0	0	0	0	0	0	1	0	4	0	0	0	0	0	0	0	0	0	0	0	0	25	0	0	0	0	0	0	0	0	0	0	0
1101	0	0	0	0	0	0	0	0	0	0	0	0	0	0	0	0	0	0	0	0	0	0	0	0	0	0	0	0	0	0	1	0	0	14	0	0	0	0	0	0	0	0	0	0	0
1102	1	0	0	0	1	0	0	0	0	0	0	3	0	1	4	0	0	0	0	0	0	0	0	0	0	0	7	0	0	0	2	0	0	0	0	0	0	0	0	0	0	0	2	0	0
1103	0	0	0	0	0	0	0	0	0	0	0	0	0	1	2	0	0	0	0	0	2	0	0	0	0	0	0	0	0	0	1	0	1	6	2	0	0	0	0	0	0	0	0	0	1
1104	0	0	0	0	0	0	0	0	0	0	0	0	4	2	0	0	0	2	0	0	0	0	0	0	0	0	1	0	0	0	0	0	0	0	0	0	0	0	0	0	1	0	0	0	0
1105	0	0	0	0	0	0	0	0	0	0	0	0	7	0	0	0	0	0	0	0	0	0	1	0	0	0	0	0	0	0	0	0	0	0	0	0	0	0	0	0	0	0	0	1	0
1106	0	0	0	0	0	0	0	0	0	0	0	2	4	0	2	0	0	0	0	0	3	0	0	0	0	0	7	0	2	0	0	0	2	8	0	0	0	0	0	0	0	0	0	0	0
1107	0	0	0	0	0	0	0	0	0	0	0	0	0	0	0	0	0	0	0	0	0	0	0	0	0	0	0	0	0	0	2	0	0	8	0	0	0	0	0	0	0	0	0	0	0
1108	0	0	0	0	0	0	0	0	0	0	0	0	1	0	0	0	0	1	1	0	4	0	0	0	0	0	0	0	0	0	0	0	0	0	0	0	0	0	0	0	0	0	0	9	0
1109	0	0	0	0	0	0	0	0	0	0	0	0	0	0	0	0	0	0	0	0	0	0	0	0	0	0	0	0	0	0	0	1	0	18	0	0	0	0	0	0	0	0	0	0	0
1201	0	0	0	0	1	0	0	0	0	0	0	0	0	0	0	0	0	0	0	1	2	0	0	0	0	0	0	0	0	1	1	0	0	3	0	0	0	0	0	0	0	0	0	0	0
1202	0	0	0	0	0	0	0	0	0	0	0	0	0	0	0	0	0	0	2	0	0	0	0	0	0	0	0	0	0	0	0	2	0	18	0	0	0	0	0	0	0	0	0	0	0
1203	0	0	0	0	1	0	0	0	0	0	0	0	0	0	0	0	0	0	0	0	0	0	0	0	2	0	0	0	0	0	0	0	0	15	0	0	0	0	1	0	0	0	0	0	0
1204	0	0	0	0	0	0	0	0	0	0	0	0	0	0	0	0	0	0	0	0	1	0	0	0	0	0	0	0	0	0	0	7	0	35	0	0	0	0	0	0	0	0	0	0	0
1205	0	0	0	0	0	0	0	0	0	0	0	0	5	0	0	0	0	0	7	0	0	0	0	0	0	0	0	0	1	2	0	0	2	0	0	0	0	0	0	0	1	0	0	0	0
1206	2	0	0	0	3	0	0	0	0	0	0	0	0	2	1	0	0	0	6	0	14	0	0	0	0	0	1	0	0	0	2	0	3	0	0	0	0	0	0	1	0	0	0	1	0
1207	0	0	0	0	0	0	0	0	0	0	0	0	0	0	2	0	1	0	1	0	0	0	0	0	0	0	0	0	0	1	0	0	0	2	0	0	0	1	0	0	0	0	0	2	0
1208	1	0	0	0	0	0	0	0	0	0	0	0	0	0	0	0	0	0	2	0	0	0	0	0	0	0	21	0	0	0	0	0	0	0	0	0	0	0	0	0	1	0	0	1	0
1209	0	0	0	0	0	0	0	0	0	0	0	0	0	0	0	0	0	0	0	0	0	0	0	0	0	0	0	0	0	0	0	2	0	9	0	0	0	0	0	0	0	0	0	0	0
1301	0	0	1	0	0	0	0	0	0	0	0	2	0	0	0	0	0	0	0	1	0	0	0	0	0	0	0	1	0	0	1	0	0	0	0	0	0	0	0	0	0	0	0	0	0
1302	0	0	0	0	0	0	2	0	0	0	0	0	0	0	0	0	0	0	0	0	2	0	0	0	0	0	1	0	0	0	0	0	0	4	0	0	0	0	0	0	0	0	0	0	0
1303	0	0	0	0	0	0	0	0	0	0	0	2	0	0	1	0	0	0	0	0	1	0	0	0	0	0	20	0	0	0	0	0	1	0	0	0	0	0	0	0	0	0	0	1	0
1304	0	0	0	0	0	0	1	0	0	0	0	1	0	0	0	0	1	0	0	1	2	0	0	0	0	0	0	0	0	3	0	0	0	0	0	0	1	1	0	0	0	0	0	0	0
1305	0	0	0	0	0	0	0	0	0	0	0	1	6	0	0	1	0	11	0	0	0	0	0	0	0	0	10	0	0	1	0	0	1	2	0	0	0	0	0	0	0	0	0	0	0
1306	0	0	1	0	0	0	0	0	0	0	0	0	0	0	0	0	0	0	0	0	0	0	0	0	0	0	0	0	0	0	0	0	0	15	0	0	1	0	0	0	0	0	0	0	0
1307	0	0	1	0	0	0	3	0	0	0	0	0	1	0	0	0	5	0	0	0	0	0	0	0	0	0	0	0	0	0	1	0	0	2	0	0	4	0	0	0	0	0	0	0	0
1308	0	0	0	0	0	0	1	0	0	0	0	0	0	0	1	0	0	0	0	0	0	0	0	0	0	0	0	0	0	0	0	0	0	0	0	0	0	0	0	0	0	0	0	0	0
1309	0	0	0	0	0	0	2	0	0	0	0	0	3	0	0	0	2	4	1	0	0	0	0	0	0	0	10	0	0	1	0	0	0	7	0	0	0	5	0	0	0	0	0	1	0
1401	0	0	0	0	0	0	0	0	0	0	0	0	0	0	0	0	0	0	0	1	0	0	0	0	0	0	0	0	0	0	0	0	0	9	0	0	0	0	0	0	0	0	0	0	0
1402	0	0	0	0	0	1	0	0	0	0	0	0	0	0	0	0	0	0	0	0	0	0	0	0	0	0	0	0	0	0	1	0	0	22	0	0	0	0	0	0	0	0	0	0	0
1403	0	0	0	0	0	1	2	0	0	0	0	29	0	1	9	0	2	0	0	0	0	0	0	0	0	0	15	0	0	0	0	0	0	15	0	0	0	0	0	0	0	0	0	2	0
1404	0	0	0	0	4	0	0	0	0	0	0	0	0	0	0	0	0	0	1	0	0	0	0	0	0	0	15	0	0	2	0	0	1	10	0	0	0	0	0	0	0	0	0	1	0
1405	0	0	0	0	1	0	1	0	0	0	0	1	0	0	0	0	3	0	0	0	0	0	0	0	0	0	1	0	0	0	0	0	0	3	0	1	0	5	0	0	0	0	0	1	0
1406	0	0	0	0	0	1	3	0	0	0	0	3	0	0	1	0	0	0	0	0	0	0	0	0	0	0	0	0	0	0	0	0	0	1	0	0	0	2	0	0	0	0	2	0	0
1407	0	0	0	1	0	2	0	0	0	0	0	0	0	0	0	0	0	0	0	0	0	0	0	0	0	0	0	0	0	0	0	0	0	9	0	0	0	0	0	0	0	0	0	0	0
1408	0	0	0	0	0	0	2	0	0	0	0	1	0	0	0	0	1	0	0	0	0	0	0	0	0	1	3	0	0	0	0	0	1	0	0	0	0	1	0	0	1	0	0	0	0
1409	0	0	0	0	0	0	0	0	0	0	0	0	5	1	2	0	0	0	0	0	0	0	0	0	0	0	0	0	1	0	0	2	1	2	0	0	0	0	0	0	0	0	0	0	0
1501	0	0	0	0	0	0	0	0	0	0	0	1	0	0	0	0	0	1	0	0	3	0	0	0	0	0	2	0	0	0	0	0	4	1	0	0	0	0	0	0	0	0	0	2	0
1502	1	0	0	0	0	0	0	0	0	0	0	1	1	1	1	0	1	2	0	0	0	0	0	0	0	0	2	0	0	0	0	0	1	0	0	0	0	0	0	1	0	0	0	2	0
1503	0	0	0	0	0	0	0	0	0	0	0	0	0	0	0	0	0	3	0	0	0	0	0	0	0	0	0	0	0	0	0	0	0	0	0	0	0	0	0	0	0	0	0	1	0
1504	0	0	0	0	0	0	0	0	0	0	0	0	0	0	0	0	0	0	0	0	2	0	0	0	0	0	0	0	0	0	0	0	0	11	0	0	0	0	0	0	0	0	0	0	0
1505	0	0	0	0	0	0	1	0	0	0	0	2	0	0	0	0	7	0	0	0	0	0	1	0	0	0	0	0	1	0	0	0	1	5	1	0	1	0	0	1	0	1	0	0	0
1506	0	0	0	0	0	0	0	0	0	0	0	1	3	0	0	0	0	0	0	0	3	0	0	0	0	0	1	0	0	0	0	0	1	0	0	0	0	0	0	0	0	0	1	1	0
1507	0	0	1	0	0	1	0	0	0	0	0	0	0	0	0	1	0	1	0	0	1	0	0	0	0	0	0	0	0	0	0	0	1	0	0	0	0	0	0	0	0	0	0	0	0
1508	0	0	5	0	0	2	0	0	0	0	0	1	0	0	0	0	0	0	0	0	1	0	0	0	0	8	0	0	0	0	0	2	0	40	2	0	1	0	0	0	0	0	0	0	0
1509	0	0	1	0	0	3	0	0	0	0	0	0	0	0	0	0	0	0	0	0	6	0	0	0	0	3	0	1	0	0	0	0	0	0	0	0	1	1	0	0	0	0	0	0	0
1601	0	0	0	0	0	2	0	0	0	0	0	0	0	0	0	1	3	0	0	0	0	0	0	0	0	0	0	0	2	0	0	0	0	13	0	0	0	0	0	0	0	17	0	0	0
1602	0	0	0	0	0	0	0	0	0	0	0	0	0	0	0	0	1	0	0	0	4	0	0	0	0	0	0	0	0	0	0	0	0	6	2	0	0	0	0	0	0	0	0	0	0
1603	0	0	0	0	0	0	0	0	0	0	0	0	5	0	2	0	0	0	2	0	2	0	0	0	0	0	1	0	0	0	0	0	0	0	0	0	0	0	0	0	0	0	0	2	0
1604	0	0	9	0	0	0	0	0	0	0	0	0	0	0	0	0	0	0	0	0	0	0	0	0	3	0	0	0	0	0	0	10	0	0	0	0	0	0	0	0	0	0	0	0	0
1605	0	0	0	0	0	0	0	0	0	0	0	0	2	0	0	0	0	0	0	0	0	0	0	0	0	0	6	0	0	0	0	0	1	0	0	0	0	0	0	0	0	0	0	0	0
1606	0	0	0	0	0	0	0	0	0	0	0	0	0	0	0	0	0	0	0	0	1	0	0	0	0	0	0	0	1	0	0	3	0	24	0	0	0	0	0	0	0	0	0	0	0
1607	0	0	3	0	0	1	0	0	0	0	0	0	0	0	0	0	0	0	0	0	1	0	0	0	2	0	0	0	0	0	0	3	0	0	0	0	3	0	0	0	0	0	0	0	0
1608	0	0	0	0	0	0	0	0	0	0	0	0	1	0	0	0	0	0	0	0	0	0	0	0	0	0	2	0	2	3	0	0	1	10	0	0	0	0	0	0	0	0	0	0	0
1609	0	0	4	0	0	0	0	0	0	0	0	0	0	0	0	0	0	0	0	0	0	0	0	0	0	0	0	0	0	0	0	3	0	21	0	0	0	0	0	0	0	0	0	0	0
1701	0	0	0	0	0	0	0	0	0	0	0	0	0	1	2	0	0	0	0	0	0	0	0	0	0	0	0	0	0	0	0	0	1	1	0	0	0	0	0	0	0	0	0	0	1
1702	0	0	0	0	0	0	0	0	0	0	0	0	0	0	0	0	0	0	0	0	1	0	0	0	0	0	0	0	0	0	0	0	0	5	1	0	0	0	0	0	0	0	0	0	0
1703	0	0	0	0	0	0	0	0	0	0	0	0	0	0	3	0	0	1	0	0	2	0	0	0	0	0	11	0	0	0	0	0	1	0	0	0	0	0	0	0	1	0	0	0	0
1704	0	0	11	0	1	1	0	0	0	0	0	0	0	0	0	0	0	0	0	0	3	0	0	0	0	0	0	0	0	0	0	3	0	57	0	0	3	0	0	0	0	0	0	0	0
1705	0	0	0	0	0	1	0	0	0	0	0	0	0	0	0	0	0	0	0	0	2	0	0	0	0	0	0	0	0	0	0	5	0	33	0	0	2	1	0	0	0	0	0	0	0
1706	0	0	0	0	0	0	0	0	0	0	0	0	0	0	0	0	0	0	0	0	2	0	0	0	0	0	0	0	0	0	1	0	0	2	0	0	0	0	0	0	0	0	0	0	0
1707	3	0	0	0	0	0	0	0	0	0	0	0	0	0	1	0	0	2	1	0	0	0	0	0	0	0	0	0	0	0	0	0	2	0	0	0	0	0	0	0	0	0	1	0	0
1708	0	0	0	0	1	1	0	0	0	0	0	0	0	0	0	0	0	0	0	0	1	0	0	0	0	0	0	0	0	0	0	20	0	21	1	0	0	0	0	0	0	0	0	0	0
1709	0	0	23	0	0	0	0	0	0	0	0	0	0	0	0	0	0	0	0	0	0	0	0	0	0	5	0	0	0	0	0	0	0	0	0	0	0	0	0	0	0	0	0	0	0
1801	0	0	0	0	0	0	0	0	0	0	0	0	0	1	0	1	0	3	1	0	0	0	0	0	0	0	2	0	0	0	0	0	3	4	0	0	0	0	0	0	0	0	0	0	0
1802	0	0	0	0	0	0	0	0	0	0	0	0	0	0	0	0	0	2	0	0	2	0	0	0	0	0	1	0	0	0	0	0	0	0	0	0	0	0	0	0	0	0	1	0	0
1803	0	0	0	0	0	0	0	0	0	0	0	0	0	0	1	2	0	0	0	5	0	0	0	0	0	0	0	0	0	0	0	0	0	0	0	0	0	0	0	0	0	0	0	1	0
1804	0	0	0	0	0	0	0	0	0	0	0	0	1	0	0	0	2	1	0	1	0	0	0	0	0	0	0	1	0	0	0	1	0	0	1	0	0	0	0	0	0	0	0	0	0
1805	2	0	0	0	0	0	0	1	0	0	0	0	0	0	0	1	0	0	0	0	0	0	0	0	0	0	0	0	0	0	0	0	0	0	1	0	0	0	0	0	0	0	0	0	0
1806	0	0	0	0	0	0	0	0	0	0	0	0	0	0	0	0	0	0	0	0	0	0	0	0	0	0	0	0	0	0	0	0	0	0	1	0	0	0	0	0	0	0	0	0	0
1807	0	0	0	0	0	0	0	0	0	0	0	0	0	0	0	0	0	0	0	0	0	0	0	0	0	0	0	0	0	0	0	0	0	7	0	0	0	0	0	0	0	0	0	0	0
1808	2	0	0	0	0	0	0	0	0	0	0	0	1	0	0	0	0	0	1	0	0	0	0	0	0	0	0	0	0	0	0	0	0	0	0	0	0	0	0	0	0	0	0	0	0
1809	0	0	1	0	0	0	0	0	0	0	0	0	0	0	0	0	0	0	0	0	0	0	1	0	0	0	0	1	0	0	0	0	0	0	0	0	1	0	0	0	0	0	0	0	0
1901	0	0	0	1	0	0	0	1	0	0	0	0	0	0	0	0	0	0	0	0	0	0	0	0	0	0	0	0	0	0	0	0	0	9	0	0	0	0	0	0	0	0	0	0	0
1902	0	0	0	0	0	0	0	0	0	0	0	0	0	0	0	0	0	0	0	0	0	0	0	0	0	0	0	0	0	0	0	0	0	1	0	0	0	0	0	0	0	0	0	1	0
1903	0	0	0	0	0	2	0	0	0	0	0	0	0	0	1	0	0	0	0	0	0	0	0	0	0	0	0	0	0	0	0	0	0	0	1	0	0	0	0	0	0	0	0	2	1
1904	0	0	1	0	0	1	0	0	0	0	0	0	0	0	0	0	0	0	0	0	0	0	0	0	2	0	0	0	0	0	0	0	0	29	0	0	0	0	0	0	0	0	0	0	0
1905	0	0	0	0	2	0	0	0	0	0	0	0	0	0	0	0	0	0	0	0	1	0	1	0	0	0	0	0	0	0	0	0	0	0	0	0	0	0	0	0	0	0	0	0	0
1906	0	0	0	0	0	0	0	0	0	1	0	0	0	0	0	0	2	0	0	1	0	0	0	0	0	0	0	0	0	0	0	1	0	0	1	0	1	0	0	0	0	0	0	0	0
1907	0	0	0	0	0	0	1	0	0	1	0	0	0	2	1	0	1	0	0	0	0	0	0	0	0	0	0	0	0	0	0	0	0	1	0	0	0	1	0	0	0	0	0	0	0
1908	0	0	4	0	0	5	0	0	0	0	0	0	0	0	0	0	0	0	0	0	0	0	0	0	0	0	0	3	0	0	0	0	0	0	0	0	2	0	0	0	0	0	0	0	1
1909	0	0	0	0	1	0	0	0	0	0	0	0	0	0	0	0	0	0	0	0	0	0	0	0	9	0	0	0	0	0	0	1	0	0	0	0	0	0	0	0	0	0	0	0	0
2001	0	0	0	2	0	0	5	0	0	0	0	0	0	0	0	0	1	0	0	0	0	0	0	0	0	0	5	0	0	0	0	0	0	4	1	0	0	1	0	0	0	0	0	0	0
2002	0	0	2	1	2	0	0	0	0	0	0	0	0	0	0	0	0	0	0	0	1	0	0	0	0	0	0	2	0	0	0	0	0	27	0	0	0	0	0	0	0	0	0	0	0
2003	0	0	0	0	0	0	0	0	0	0	0	0	0	0	0	0	0	0	0	0	1	0	0	0	0	0	0	0	0	0	0	0	0	6	1	0	1	0	0	0	0	0	0	0	0
2004	0	9	0	0	0	0	0	0	0	0	0	0	0	0	1	0	0	0	0	0	0	0	0	0	0	0	0	0	1	0	0	1	0	1	0	0	0	0	0	0	0	0	0	0	3
2005	0	0	0	0	0	0	0	0	0	0	0	0	0	0	0	0	0	0	0	0	0	0	0	0	0	0	0	0	0	0	0	0	0	4	0	0	0	0	0	0	0	0	0	0	0
2006	0	1	0	0	1	0	0	0	0	0	0	0	0	0	2	0	0	0	0	0	0	0	0	0	0	0	5	0	0	0	0	0	0	6	1	0	0	0	0	0	0	0	0	0	0
2007	0	0	0	0	0	0	0	0	0	0	0	0	0	7	0	0	0	0	0	0	0	0	0	0	0	0	10	0	1	0	0	0	0	0	0	0	0	0	0	0	0	0	0	1	0
2008	0	0	1	0	0	0	0	0	0	0	0	0	0	0	0	0	0	0	0	0	0	0	0	0	0	3	0	0	0	0	0	0	0	1	1	0	0	0	0	0	0	0	1	0	0
2009	0	0	0	0	1	0	1	0	0	0	0	0	1	0	0	0	0	0	0	0	0	0	0	0	0	0	0	0	0	0	0	1	2	0	1	0	0	0	0	0	1	0	0	0	0
2010	0	0	0	0	0	0	0	0	0	1	0	2	0	0	1	0	1	0	0	0	0	0	0	0	0	0	3	0	0	0	0	0	0	0	0	0	0	3	0	0	0	0	0	0	0
2011	0	0	0	0	0	0	0	0	0	0	0	0	0	0	0	3	0	0	0	0	2	0	0	0	0	0	0	0	0	0	0	0	0	1	0	0	0	0	0	0	0	0	0	0	0
2012	0	0	0	0	2	0	0	0	0	0	0	0	0	0	0	0	0	1	0	0	1	0	0	0	0	0	0	0	0	0	0	2	0	1	0	0	0	0	0	0	0	0	0	0	0
2101	0	0	0	0	0	0	1	0	0	1	0	0	0	0	3	0	0	0	0	0	0	0	0	0	0	0	0	0	0	0	0	0	1	2	0	0	0	1	0	0	0	0	0	0	0
2102	0	0	0	1	0	3	0	0	0	4	0	0	0	0	2	0	4	0	1	0	0	0	0	0	0	0	5	0	0	0	0	1	0	7	0	0	0	0	0	0	0	0	0	0	0
2103	0	0	0	0	0	0	0	0	0	0	0	0	0	0	0	0	0	0	0	0	0	0	0	0	0	0	0	0	0	0	0	1	0	10	0	0	0	0	0	0	0	0	0	0	0
2104	1	0	0	0	0	0	0	0	0	0	0	0	1	1	0	0	1	0	0	0	0	0	0	0	0	0	3	0	0	0	0	0	0	0	0	0	0	0	0	0	0	0	1	0	0
2105	0	0	0	0	1	1	0	0	0	0	0	0	0	0	2	0	0	0	1	0	0	0	0	0	0	0	0	0	2	0	0	1	0	19	3	0	0	0	0	0	0	0	0	0	0
2106	0	0	0	0	0	1	9	0	0	0	0	0	0	0	0	0	1	0	0	0	3	0	0	0	0	0	0	0	0	0	0	1	0	1	0	0	0	0	0	0	0	0	0	0	0
2107	0	0	0	1	0	0	2	0	0	0	0	0	0	1	1	0	0	0	1	0	0	0	0	0	0	0	1	0	0	0	0	0	2	0	0	0	0	0	0	0	0	0	0	0	0
2108	0	0	0	0	0	0	3	0	0	0	0	0	0	0	1	0	1	1	0	1	0	0	0	0	0	0	0	0	0	0	0	0	0	1	0	0	0	1	0	0	0	0	0	0	0
2109	0	0	1	0	0	2	1	0	0	0	0	0	0	0	0	0	0	0	0	0	1	0	0	0	0	0	0	0	0	0	4	1	0	4	0	0	1	0	0	0	0	0	0	0	0
2201	0	0	0	2	1	0	0	0	0	0	0	0	0	0	0	0	3	0	0	1	0	0	0	0	0	0	0	0	0	0	0	4	0	20	0	0	2	0	0	0	0	0	0	0	0
2202	0	0	0	0	1	0	0	0	0	0	1	0	0	0	0	0	1	0	0	0	0	0	0	0	0	0	0	0	0	0	0	4	0	8	0	0	0	0	0	0	0	0	0	0	0
2203	0	0	0	0	0	0	0	0	0	1	0	0	0	0	0	0	0	0	0	0	2	0	0	0	0	0	0	0	0	0	0	0	0	0	0	0	0	0	0	0	0	0	0	0	0
2204	0	0	0	0	0	0	0	0	0	0	0	0	0	0	0	0	0	0	0	0	2	0	0	0	0	0	0	0	0	0	0	0	0	81	0	0	0	0	0	0	0	0	0	0	0
2205	0	0	0	0	0	0	0	0	0	0	0	0	0	0	0	0	0	0	0	1	0	0	0	0	0	0	0	0	0	0	0	0	0	56	0	0	0	0	0	0	0	0	0	0	0
2206	0	0	0	0	0	0	0	0	0	0	0	0	0	0	0	0	1	0	0	1	2	0	0	0	0	0	16	0	0	0	0	1	1	15	0	0	0	1	0	0	2	0	0	0	0
2207	0	0	0	0	1	0	0	0	0	0	0	0	0	0	0	0	0	0	0	0	0	0	0	0	0	0	0	0	0	0	0	4	0	63	0	0	0	1	0	0	0	0	0	0	0
2208	0	0	0	0	1	0	0	0	0	0	0	0	0	3	0	0	0	0	0	0	1	0	0	0	1	0	6	0	0	0	0	0	1	0	3	0	0	3	0	1	0	0	0	1	0
2209	0	0	0	0	1	0	0	0	0	0	0	0	0	2	2	0	3	0	0	0	0	0	0	0	0	0	17	0	0	0	0	5	3	25	0	0	0	0	0	0	0	0	1	0	0
2301	0	0	1	0	1	0	1	0	0	1	0	0	3	0	0	0	0	0	0	0	0	0	0	0	0	0	14	0	0	0	0	0	0	2	0	0	0	0	0	0	0	0	1	2	0
2302	0	0	0	0	0	0	0	0	0	0	0	0	4	0	1	0	0	4	0	0	0	0	0	0	0	0	6	0	0	0	0	0	0	2	0	0	0	0	0	0	0	0	0	0	0
2303	0	0	0	0	0	0	0	0	0	0	0	0	0	0	0	2	2	2	0	0	1	0	0	0	0	0	0	1	1	0	0	0	0	1	0	0	0	0	0	0	0	0	0	0	0
2304	0	0	0	0	0	0	0	0	0	0	1	0	0	0	0	0	0	0	0	0	0	0	3	0	0	0	0	0	0	0	0	1	0	14	0	0	0	0	0	0	0	0	0	0	0
2305	0	0	0	0	0	0	0	0	0	0	0	0	0	0	0	0	0	0	0	1	0	0	0	0	0	0	0	0	0	0	0	0	0	19	0	0	0	0	0	0	0	0	0	0	0
2306	0	0	0	0	0	0	1	0	0	0	0	0	0	0	0	0	0	0	0	0	0	0	0	0	0	3	0	0	0	0	0	1	0	4	0	0	2	0	0	0	0	0	0	0	0
2307	0	0	0	0	0	0	1	0	0	0	0	0	0	0	0	0	0	0	0	0	3	0	0	0	0	0	0	0	0	0	0	2	0	8	1	0	1	0	0	0	0	0	0	0	0
2308	0	0	0	0	0	0	2	0	0	0	0	0	0	0	0	0	0	1	0	0	3	0	0	1	0	0	5	0	0	1	1	1	0	0	0	0	0	0	0	0	0	0	0	0	0
2309	0	0	0	0	0	2	0	0	0	0	0	0	0	0	0	0	5	0	0	0	0	0	0	0	0	0	0	1	0	0	0	0	0	3	1	0	2	0	0	0	0	0	0	0	0
3010	0	0	0	0	1	0	0	0	0	0	0	0	1	0	3	0	0	0	0	0	0	0	0	0	0	0	1	0	0	0	0	0	1	0	0	1	0	0	0	0	0	0	0	0	0
3011	0	0	0	0	0	0	0	0	0	0	0	0	0	0	0	0	3	0	0	0	0	0	0	0	0	0	0	0	0	0	0	0	0	8	0	0	0	0	0	0	0	0	0	0	0
3012	0	0	0	0	0	0	0	0	0	0	0	0	0	0	0	0	0	0	0	0	0	0	0	0	2	0	0	0	0	0	0	3	0	41	0	0	0	0	0	0	0	0	0	0	0
4010	0	0	0	0	0	0	0	0	0	0	0	0	0	0	1	0	0	0	0	0	0	0	1	0	0	0	0	0	0	1	0	0	0	0	0	0	0	0	0	0	0	0	0	1	0
4011	0	0	4	0	0	0	0	0	0	0	0	0	0	0	0	0	2	0	0	1	0	0	0	0	0	0	0	1	0	0	0	0	0	0	0	0	0	0	0	0	0	0	0	0	0
4012	0	0	0	0	0	0	0	0	0	0	0	0	0	0	0	0	0	2	0	0	3	0	0	0	0	0	0	0	0	0	0	0	0	0	0	0	1	0	0	0	1	0	0	0	0
5010	0	0	0	0	0	0	0	0	0	0	0	0	1	1	2	0	3	0	0	0	0	0	0	0	0	0	28	0	0	2	0	0	2	6	0	0	0	0	0	0	1	2	0	6	0
5011	0	0	0	0	0	0	0	0	0	0	0	0	1	1	8	0	0	0	3	0	1	0	0	0	0	0	4	0	0	0	0	2	0	14	0	0	0	0	0	3	0	0	0	0	0
5012	0	0	0	0	4	1	0	0	0	0	0	0	0	2	0	0	0	0	0	0	0	0	0	0	0	0	0	0	1	0	0	0	0	2	1	0	2	0	0	0	0	0	0	0	0
6010	0	0	0	0	0	0	0	0	0	0	0	5	0	0	0	0	1	0	0	0	3	0	0	0	0	0	6	0	0	0	1	1	1	8	0	0	0	1	0	0	0	0	0	0	0
6011	0	1	0	0	0	0	0	0	0	0	0	0	0	0	0	0	0	0	2	0	1	0	0	0	0	0	1	0	0	1	0	0	1	11	0	0	0	1	0	0	1	0	0	0	0
6012	0	0	0	0	0	0	0	0	0	0	0	0	0	0	0	0	0	0	0	0	0	0	0	0	0	0	0	0	0	0	0	0	0	38	0	0	0	0	0	0	0	0	0	0	0
7010	0	0	0	0	0	0	0	0	0	0	0	0	3	2	1	0	0	2	0	0	0	0	0	0	0	0	0	0	0	1	0	0	1	1	0	0	0	0	0	0	0	0	0	0	0
7011	1	0	0	0	0	0	0	0	0	0	0	0	0	0	0	0	3	0	0	1	0	0	0	0	0	0	0	1	0	0	0	1	0	0	0	0	0	0	0	0	0	0	0	0	0
7012	0	1	0	0	2	0	0	0	0	0	0	0	0	3	0	0	0	0	1	5	3	0	0	0	1	0	0	0	0	0	0	2	0	11	0	0	0	0	0	0	1	0	0	0	0
8010	0	0	11	0	0	2	0	0	0	0	0	0	0	0	0	0	0	0	0	0	0	0	0	0	0	1	0	0	0	0	0	1	0	0	0	0	0	0	0	0	0	0	0	0	0
8011	0	0	0	0	5	0	0	0	0	0	0	0	0	10	0	2	3	0	1	0	1	0	0	0	5	0	8	0	1	3	0	0	0	1	0	0	0	0	0	2	0	0	0	1	0
8012	1	0	0	0	0	1	1	0	0	0	0	1	0	0	1	0	0	0	2	0	2	0	0	0	0	0	12	0	1	0	0	0	0	0	0	0	0	0	0	1	1	0	1	0	0
9010	0	0	0	1	0	0	0	0	0	0	0	0	0	0	0	0	0	0	1	0	0	1	0	0	0	0	0	0	0	0	0	0	0	7	0	0	0	0	0	0	0	0	0	0	0
9011	0	0	0	0	0	0	3	0	0	0	0	15	0	0	0	0	0	0	0	0	0	0	0	0	0	0	1	0	0	0	0	0	0	1	0	0	0	0	0	0	0	0	0	0	0
9012	0	0	0	0	0	0	1	0	0	0	0	0	0	0	0	0	0	0	0	0	0	0	0	0	0	0	0	0	0	0	0	0	0	0	0	0	4	0	0	0	0	0	0	0	0
10010	0	0	0	0	0	1	0	0	0	0	0	0	0	1	0	0	1	0	0	0	2	0	0	0	0	0	10	0	0	0	0	0	0	4	0	0	4	0	0	0	0	0	0	0	0
10011	0	0	2	0	0	3	0	0	0	0	0	0	0	0	0	0	0	0	0	0	0	0	0	0	0	0	0	0	0	0	0	3	0	8	1	0	1	0	0	0	0	0	0	0	0
10012	1	0	0	0	0	0	0	0	0	0	0	0	1	0	1	0	0	1	0	0	0	0	0	0	0	0	12	0	0	0	0	0	2	0	0	0	0	0	0	0	0	0	0	1	0
11010	0	0	0	0	0	0	0	0	0	0	1	0	0	0	0	0	3	0	0	0	0	0	0	0	0	0	0	0	0	0	0	2	0	20	0	0	0	0	0	0	0	0	0	0	0
11011	0	0	0	0	0	0	1	0	0	0	0	1	0	0	0	0	1	0	0	0	0	0	0	0	0	0	0	0	0	0	1	0	0	19	0	0	0	0	0	0	0	0	0	0	0
11012	0	0	0	0	0	0	0	0	0	0	0	3	0	0	0	0	0	0	0	1	0	0	0	0	0	0	0	0	0	0	0	1	0	39	1	0	0	0	0	0	0	0	0	0	0
12010	0	0	1	0	0	0	0	0	0	0	0	0	0	0	0	0	0	0	0	0	0	0	0	0	0	0	0	0	0	0	0	0	0	0	0	0	3	0	0	0	0	0	0	0	0
12011	0	0	0	0	0	0	0	0	0	0	0	0	0	0	0	0	2	0	0	0	0	0	0	0	0	0	0	0	1	0	0	0	0	2	0	0	0	0	0	0	0	0	0	0	0
12012	0	0	0	0	0	0	0	0	0	0	0	0	0	0	0	0	1	0	0	0	0	0	0	0	0	0	0	0	0	0	2	0	0	0	0	0	0	0	0	0	0	0	0	0	0
13010	0	0	0	0	1	0	0	0	0	0	0	0	11	0	0	0	1	0	0	0	0	0	0	0	0	0	5	0	0	0	0	0	2	25	0	0	0	0	0	0	0	0	0	0	0
13011	0	0	0	0	0	0	5	0	0	0	0	1	0	0	1	0	0	0	0	0	0	0	0	0	0	0	0	0	0	0	0	0	0	0	1	0	0	0	0	0	0	0	0	0	0
13012	0	0	0	0	2	0	1	0	0	0	0	0	23	10	3	0	0	0	0	1	0	0	0	0	0	0	8	0	0	0	0	2	1	6	0	0	0	0	0	0	4	0	0	0	0
14010	0	0	0	0	0	0	0	0	0	0	5	0	0	0	0	0	1	0	0	0	1	0	0	0	0	0	0	0	0	0	0	2	0	19	0	0	1	0	0	0	0	0	0	0	0
14011	0	1	0	0	0	0	0	0	0	1	0	3	4	4	0	0	0	0	0	0	0	0	0	0	0	0	24	0	0	0	0	0	0	7	1	0	0	0	0	0	0	0	0	0	0
14012	0	0	2	0	1	0	0	0	0	0	1	0	0	0	0	0	0	0	0	0	0	0	0	0	0	0	0	0	0	0	0	0	0	21	0	0	0	0	0	0	0	0	0	0	0
15010	0	0	0	0	0	0	0	0	0	0	0	2	0	0	0	0	2	2	0	0	0	0	0	0	0	0	0	0	0	0	0	0	0	0	0	0	1	0	0	0	1	0	0	0	0
15011	0	0	0	0	0	1	0	0	0	0	0	0	0	0	0	0	0	0	0	0	1	0	0	0	0	0	0	0	0	0	1	1	0	39	0	0	1	0	1	1	0	0	0	0	0
15012	0	0	0	0	0	0	0	0	0	0	1	0	0	0	0	0	0	0	0	0	1	0	0	0	0	0	0	0	0	0	0	1	0	8	0	0	0	0	0	0	0	0	0	0	0
16010	0	0	0	0	0	0	0	0	0	0	0	0	0	0	0	0	1	0	0	0	0	0	0	0	0	0	0	0	0	0	0	0	0	0	0	0	0	0	0	0	0	0	0	0	0
16011	0	0	0	0	0	3	0	0	0	0	0	0	0	0	0	0	0	0	0	0	1	0	0	0	0	0	0	0	0	0	0	2	0	23	1	0	0	0	0	0	0	0	0	0	0
16012	0	0	0	0	0	0	0	0	0	0	0	0	0	0	0	0	0	0	0	0	3	0	0	0	0	0	0	0	0	0	0	0	0	1	0	0	0	0	0	0	0	0	0	0	0
17010	1	0	0	0	0	0	0	0	0	0	0	0	1	1	2	0	0	1	0	0	0	0	0	0	0	0	4	0	0	0	0	0	0	0	0	0	0	0	0	0	0	0	0	0	0
17011	0	0	0	0	0	0	0	0	0	0	0	0	0	0	0	0	0	0	0	1	3	0	0	0	0	0	0	0	0	0	0	0	0	0	0	0	0	0	0	0	0	0	0	0	0
17012	0	0	0	0	0	0	0	0	0	2	0	0	0	0	1	0	0	0	0	0	1	0	0	0	0	0	0	0	0	0	0	6	0	38	0	0	0	0	0	0	0	0	0	0	0
18010	0	0	1	0	0	1	0	0	0	0	0	0	0	0	1	0	1	0	0	0	0	0	0	0	0	1	0	0	0	0	0	0	1	0	0	0	2	0	0	0	0	0	0	0	0
18011	0	0	0	0	0	2	0	0	0	0	0	0	1	0	0	1	0	0	0	0	0	0	0	0	0	0	0	0	0	0	0	0	0	0	0	1	0	0	0	0	0	0	0	0	0
18012	0	0	0	0	1	0	0	0	0	0	0	0	0	0	0	0	0	0	0	0	0	0	0	0	0	0	0	0	0	0	0	0	0	0	0	0	3	0	0	0	0	0	0	0	0
19010	0	0	5	0	0	2	0	0	0	0	0	0	0	1	0	0	2	0	0	0	0	0	0	0	1	0	0	0	0	0	0	0	0	0	2	0	1	0	0	0	0	0	0	0	0
19012	0	0	0	0	0	0	0	0	0	0	0	0	0	0	0	0	0	0	0	0	0	0	0	0	0	0	1	0	0	0	0	0	0	0	0	0	0	0	0	0	1	0	0	0	0
20010	0	0	0	0	0	0	0	0	0	0	0	0	0	0	0	0	0	0	0	0	1	0	0	0	0	0	0	0	0	0	1	0	0	0	0	0	0	0	0	0	0	0	0	0	0
20011	0	0	0	0	0	0	0	0	0	0	0	0	0	0	0	0	0	0	0	0	0	0	0	0	0	0	0	0	0	0	0	0	0	7	0	0	1	0	0	0	0	0	0	0	0
20012	0	0	0	2	0	1	0	0	0	0	0	0	0	0	0	0	0	0	0	0	0	0	0	0	0	0	0	0	0	0	0	3	0	45	0	0	0	0	0	0	0	0	0	0	0
21010	0	0	0	0	0	0	2	0	0	0	0	0	0	0	2	0	0	0	0	0	0	0	0	0	0	0	16	0	0	0	0	0	2	0	0	0	0	2	0	0	0	0	0	0	0
21011	0	0	0	0	0	0	0	0	0	0	0	0	0	0	0	0	0	0	0	0	0	0	0	0	0	0	0	0	1	0	0	0	0	37	1	0	0	0	0	0	0	0	0	0	0
21012	0	0	0	0	0	0	4	0	0	0	0	0	0	0	3	1	1	0	0	0	0	0	0	0	0	0	4	0	1	0	0	0	0	0	0	0	0	2	0	0	0	0	0	1	0
22010	0	0	0	0	0	0	0	0	0	5	0	0	0	12	0	0	1	0	0	0	0	0	0	0	0	5	8	0	0	0	0	3	0	0	0	0	0	3	0	0	0	0	0	0	0
22011	0	0	0	0	2	0	0	0	0	5	0	0	0	4	5	0	1	0	0	0	0	0	0	0	0	0	8	0	1	0	0	6	1	1	0	0	0	5	0	0	0	0	2	0	0
22012	0	0	0	0	5	0	0	0	0	0	0	0	1	6	1	0	0	1	0	0	1	0	0	0	0	0	0	0	0	0	0	0	0	9	0	0	0	0	0	0	0	0	0	1	0
23010	0	0	0	0	0	0	0	0	0	0	0	0	0	1	0	0	0	0	2	0	0	0	0	1	0	0	4	0	1	0	0	0	0	2	0	0	0	0	0	0	0	0	0	0	0
23011	0	0	0	0	0	0	0	0	0	0	0	0	0	0	0	0	1	0	0	0	0	0	0	0	0	0	0	0	0	0	1	0	0	2	0	0	0	0	0	0	0	0	0	0	0
23012	0	0	0	0	0	0	3	0	0	0	0	0	0	0	1	0	1	2	0	0	3	0	0	1	0	0	1	0	0	0	0	0	1	1	0	0	0	0	0	1	0	0	0	0	0

## Sheet: Table S5
Table S5 Abundance of large trees
	SENGAU	ACAPEN	BAUUNG	BOUPUL	BURSIM	CAEGAU	CALPAL	CHLMAN	COCACA	COCSPI	COCVIT	CROREF	DIOANI	DIOTET	DIOYUC	ERYROT	EUGAXI	EUGBUX	EXOCAR	GUEELL	GYMFLO	HELDON	JATGAU	KARHUM	LEULEU	LONRUG	LONGUA	LUESPE	LYSLAT	MACLIN	MALGLA	MIMBAH	NEEPSY	NEOEMA	PISPIS	PLAYUC	PSISAR	SEMMEX	SENATO	SENRAC	SIDOBT	TABCHR	TALOLI	THOPAU	VITGAU
101	0	0	0	1	2	1	0	0	0	0	0	0	0	0	0	1	0	0	0	2	8	0	1	0	0	1	0	0	1	0	5	0	0	0	2	0	0	0	2	0	0	0	0	0	0
102	0	0	0	1	1	0	0	0	0	0	0	0	0	0	0	0	0	0	0	0	2	0	0	0	0	0	0	0	1	0	0	9	0	1	4	0	0	0	0	0	0	0	0	0	0
103	0	0	0	0	9	7	0	1	0	0	0	0	0	0	0	2	0	0	0	0	6	0	2	0	0	0	0	0	0	0	12	0	0	0	0	0	0	0	0	0	0	0	0	0	0
104	0	0	0	0	9	0	0	0	0	0	0	0	2	0	0	5	0	0	2	0	12	0	2	0	0	0	0	0	4	1	3	0	3	0	1	0	0	0	0	0	1	0	0	2	0
105	3	0	0	0	2	0	0	0	0	0	0	0	0	0	1	1	0	0	0	2	14	0	0	1	0	0	5	0	0	1	2	0	2	0	0	0	0	0	0	0	2	0	1	2	0
106	0	0	0	1	10	5	0	0	0	0	0	0	3	0	0	0	1	0	0	0	5	0	0	0	0	0	0	0	18	0	0	0	0	0	1	0	0	0	1	0	0	0	0	5	0
107	1	0	0	1	1	2	0	0	0	0	0	0	2	1	0	0	0	0	14	2	1	0	0	5	0	0	1	0	14	8	0	1	0	4	1	0	0	0	0	0	3	0	0	0	0
108	0	0	0	0	0	1	0	0	0	0	0	0	0	0	0	0	0	0	0	0	2	0	0	0	0	0	0	0	0	0	0	2	0	0	8	0	0	0	1	0	0	0	0	0	0
109	1	0	0	0	8	6	0	0	0	0	1	0	0	0	0	0	0	0	0	0	5	1	0	0	0	0	0	0	0	0	0	1	0	0	0	0	0	0	2	0	0	0	0	0	1
201	0	0	0	0	13	2	0	0	0	0	1	0	0	0	0	1	0	0	0	0	11	0	0	0	0	0	0	0	0	0	1	8	0	4	0	0	0	0	0	0	1	0	0	5	0
202	0	0	1	0	4	13	0	0	0	0	4	0	0	0	0	0	0	0	0	0	0	1	0	0	0	0	0	0	0	0	0	3	0	0	1	0	0	0	0	0	0	0	0	0	0
203	7	0	0	0	0	0	0	1	1	0	0	0	0	1	0	0	0	0	5	0	3	0	0	0	0	0	1	0	1	0	0	0	6	0	0	1	0	0	0	0	2	0	0	1	1
204	0	0	0	0	7	3	0	0	0	0	4	0	0	0	0	0	0	0	0	0	10	0	0	0	0	0	0	0	0	0	0	10	0	4	2	0	0	0	0	0	0	0	0	0	0
205	0	6	0	0	2	1	0	0	0	0	0	0	0	0	0	0	0	0	0	0	5	0	0	0	0	0	0	0	1	0	0	5	0	3	6	0	0	0	0	0	0	0	0	0	0
206	0	0	0	0	8	3	0	0	0	0	2	0	0	0	0	0	0	0	0	0	20	0	0	0	0	0	0	0	0	0	1	0	0	4	0	0	0	0	0	0	0	0	0	0	0
207	0	0	0	0	0	4	0	0	0	0	0	0	0	0	0	0	0	0	0	0	0	1	0	0	0	0	0	1	0	0	0	0	0	0	3	0	0	0	0	0	0	0	0	0	0
208	0	1	0	0	0	5	0	1	0	0	0	0	0	0	0	0	0	0	0	0	0	0	0	0	0	0	0	0	0	0	0	0	0	2	0	0	0	0	0	0	0	0	0	0	0
209	4	0	0	0	2	2	0	0	0	0	0	0	0	2	0	0	0	0	2	0	3	0	0	0	1	0	0	0	12	0	0	0	3	0	1	3	0	0	0	0	3	0	0	4	1
301	0	0	0	0	4	0	0	0	0	0	2	0	0	0	0	0	0	0	0	0	0	0	0	0	1	0	0	1	0	0	0	14	0	4	2	0	0	0	0	0	0	0	0	0	0
302	0	1	5	0	0	0	0	0	0	0	0	0	0	0	0	0	0	0	0	0	1	0	0	0	0	0	0	0	0	0	0	12	0	5	6	0	0	0	0	0	0	0	0	0	0
303	0	0	0	0	17	0	0	0	0	0	0	0	0	7	0	0	0	0	0	0	0	0	0	0	1	0	0	0	0	0	0	0	0	0	4	1	0	0	0	0	0	0	0	3	0
304	4	0	0	0	10	0	0	0	0	0	0	0	0	7	0	0	0	0	0	0	0	0	0	0	0	0	0	0	1	0	0	1	0	0	6	0	0	0	0	4	0	0	0	0	0
305	0	0	0	0	2	0	0	0	0	0	0	0	0	0	0	0	0	0	0	0	0	0	0	0	0	0	0	2	0	0	0	2	0	0	4	0	0	0	0	0	0	0	0	0	0
306	0	1	0	0	8	0	0	0	0	3	0	1	0	3	0	0	0	0	0	0	6	0	0	0	0	0	1	0	7	0	0	1	0	0	4	0	0	0	0	0	0	0	0	6	0
307	0	0	0	0	0	0	0	0	0	1	0	0	0	0	0	0	0	0	0	0	0	0	0	0	1	0	0	6	1	0	0	2	0	0	1	0	0	0	0	0	0	0	0	0	0
308	1	0	0	2	7	0	0	0	0	1	0	0	0	0	0	1	1	0	0	0	5	0	1	0	0	0	1	0	5	0	0	0	0	0	1	0	0	3	1	0	0	0	0	8	0
309	1	0	0	0	3	0	0	1	1	4	1	0	0	1	0	0	0	0	0	0	5	0	0	0	0	3	2	0	5	0	0	1	1	0	1	0	0	1	0	0	0	1	0	2	0
401	0	0	1	0	1	0	0	1	0	2	1	0	0	0	0	0	1	0	0	0	0	1	0	0	0	8	0	12	0	0	0	0	0	0	3	0	3	0	0	0	0	0	0	0	0
402	0	0	0	1	2	0	0	0	0	2	1	0	0	0	0	0	1	0	0	0	8	0	0	0	0	2	0	0	2	0	2	0	1	0	0	0	7	0	0	0	0	0	0	0	3
403	5	0	0	1	3	0	0	0	0	0	0	0	2	3	1	0	0	0	1	2	4	0	0	0	0	0	19	0	0	0	0	0	2	2	1	0	0	0	0	0	2	0	0	3	0
404	0	0	2	0	3	0	0	0	0	0	0	0	3	0	0	0	1	0	0	0	4	1	1	0	0	0	0	4	0	0	0	0	0	0	0	0	5	0	0	0	0	0	0	0	0
405	0	0	0	1	2	0	0	0	0	3	0	0	0	0	1	0	0	0	0	1	10	0	1	0	0	0	0	0	6	0	0	0	2	1	6	0	1	0	0	0	0	0	1	1	2
406	0	0	0	2	1	0	0	1	1	0	0	0	2	0	0	0	1	0	0	0	2	0	0	0	0	0	0	3	0	0	0	0	0	11	5	0	3	0	0	0	0	0	0	0	0
407	4	0	0	0	2	0	0	0	0	0	0	0	0	2	0	0	0	0	14	0	3	0	0	0	0	0	17	0	3	0	1	0	2	2	0	0	0	0	0	0	3	0	0	3	0
408	0	0	0	1	0	0	0	0	0	0	0	0	0	0	0	4	4	0	3	1	0	0	2	0	0	0	0	3	0	1	0	1	1	0	1	0	4	0	0	0	0	0	0	0	1
409	1	0	0	0	7	0	0	1	0	0	0	0	1	0	1	0	0	2	1	0	27	0	0	0	0	0	4	0	0	1	0	0	4	2	0	0	0	0	0	0	1	0	0	1	0
501	3	0	0	0	2	0	0	0	0	0	0	0	5	0	3	0	0	0	0	0	12	0	0	0	0	0	4	0	0	1	0	0	3	4	0	0	0	0	0	0	1	0	1	2	0
502	0	0	0	0	0	0	0	0	0	0	0	2	1	3	2	0	0	0	0	0	8	0	0	0	0	0	25	0	4	6	0	0	2	0	0	0	0	1	0	0	0	0	2	1	1
503	0	0	0	0	14	0	0	0	0	1	0	1	0	1	0	0	0	0	0	0	1	0	0	0	0	0	4	0	5	0	0	3	0	0	2	0	0	2	0	0	1	0	0	0	0
504	0	1	0	0	4	0	0	0	0	6	0	0	0	0	0	0	0	0	0	0	0	0	0	0	0	0	6	0	1	0	0	0	0	0	2	0	0	3	0	3	0	0	0	2	1
505	0	0	0	0	2	0	0	0	0	1	0	0	0	0	0	0	0	0	0	0	0	0	0	0	0	0	0	0	1	0	0	0	0	0	2	0	0	0	0	0	0	0	0	0	0
506	4	0	0	0	5	0	0	0	0	0	0	0	1	3	1	0	0	0	1	0	6	0	0	0	0	0	9	0	3	0	0	0	1	0	0	0	0	1	0	0	1	0	1	5	0
507	3	1	0	0	4	0	0	0	0	0	0	0	1	1	0	0	0	0	3	0	6	1	0	0	0	0	2	0	2	0	0	1	0	0	0	0	0	2	0	1	3	0	1	3	0
508	2	0	0	0	6	0	0	0	2	1	0	0	1	1	2	0	0	0	0	0	4	0	0	0	0	0	0	0	2	0	0	0	0	0	1	0	0	3	0	0	0	0	2	1	2
509	0	0	0	0	5	0	0	0	0	0	0	0	0	0	0	0	0	0	0	0	0	0	0	0	0	0	1	0	6	0	0	1	0	0	1	0	0	0	0	1	0	1	0	0	0
601	0	0	0	0	1	1	0	0	0	0	0	0	0	0	0	0	0	0	0	0	0	0	0	0	0	0	0	0	0	0	0	0	0	0	1	0	0	0	0	0	0	0	0	0	0
602	0	0	0	0	7	4	0	0	0	4	0	0	0	0	0	0	0	0	0	0	2	0	0	0	0	0	0	0	0	0	0	2	0	2	0	0	0	0	0	0	0	0	0	0	0
603	0	1	0	0	12	0	0	0	0	0	2	0	0	0	0	0	3	0	0	0	1	1	0	0	0	0	0	2	0	0	0	1	0	0	4	0	1	0	1	0	0	0	0	0	0
604	4	0	0	0	5	0	0	0	0	0	0	0	0	2	0	0	0	0	1	0	2	0	0	0	0	0	1	0	12	0	0	1	0	0	0	0	0	0	0	0	2	0	0	0	0
605	0	0	0	0	0	0	0	0	0	1	0	0	0	1	0	0	0	0	0	0	0	0	0	0	0	0	0	0	1	0	0	0	0	0	3	0	0	0	0	0	0	0	0	0	2
606	0	0	0	0	5	0	0	0	0	16	0	0	0	11	0	0	1	0	0	0	2	0	0	0	0	4	1	0	1	0	0	1	0	0	2	0	0	0	0	0	0	0	0	1	1
607	0	0	0	0	0	0	0	0	0	0	0	0	0	0	0	0	0	0	0	0	0	0	0	0	0	0	0	0	0	0	0	4	0	0	2	0	0	0	0	0	0	0	0	0	0
608	2	0	0	0	0	0	0	0	0	0	0	0	0	3	3	0	0	0	0	0	12	0	0	0	0	0	3	0	0	0	0	6	0	6	0	0	0	0	0	0	1	0	0	5	0
609	0	0	0	0	20	5	0	0	0	0	0	0	0	0	0	0	1	0	7	0	1	0	0	0	0	0	0	0	13	0	0	1	0	0	3	0	0	0	0	0	0	0	0	5	1
701	4	1	0	4	3	0	0	0	0	0	0	0	0	0	0	0	0	0	4	0	4	0	0	0	0	0	1	0	0	0	0	2	0	0	1	0	0	0	0	0	3	0	0	7	1
702	8	0	0	2	2	0	0	0	0	0	0	0	1	2	0	0	0	0	0	0	5	0	1	0	0	0	2	0	1	0	0	3	0	0	0	2	0	0	0	1	2	0	0	2	0
703	0	0	0	0	0	0	0	0	0	0	1	0	0	0	0	0	0	0	0	0	0	0	0	0	2	0	0	0	1	0	0	0	0	0	1	0	0	0	0	0	0	0	0	0	0
704	0	0	0	2	5	0	0	0	0	0	0	0	0	0	1	0	0	0	2	1	9	0	0	0	0	0	0	0	4	1	1	3	1	0	1	0	0	0	0	1	0	1	0	0	0
705	1	0	0	0	9	0	0	0	0	0	0	1	1	8	0	0	1	0	1	0	3	0	0	0	0	0	1	0	14	0	0	3	2	0	0	0	0	0	0	0	0	0	0	9	0
706	1	2	0	0	3	0	0	0	0	0	0	0	0	0	0	0	0	0	0	0	1	1	0	0	0	0	0	0	12	0	0	2	0	0	1	0	0	1	0	0	0	0	0	0	0
707	1	2	0	0	1	0	0	0	0	0	0	0	2	0	0	0	0	0	1	0	0	0	0	0	1	0	1	0	7	0	0	5	0	2	1	0	0	0	0	3	0	1	0	1	0
708	2	0	0	0	6	0	0	0	1	0	0	0	0	0	0	0	0	0	9	0	5	0	0	0	0	0	0	0	6	0	0	1	0	0	0	0	0	0	0	0	1	0	0	0	0
709	1	1	0	0	1	0	0	0	0	0	0	0	0	1	0	0	0	0	1	0	1	0	0	0	0	0	0	0	11	0	0	5	1	1	2	0	0	0	0	0	1	1	0	3	0
801	0	0	0	0	6	0	0	0	0	0	1	0	0	0	0	0	0	0	0	0	0	1	0	0	10	0	0	0	0	0	0	1	0	0	0	0	1	0	0	0	0	0	0	0	0
802	0	0	0	3	9	0	0	0	0	0	0	0	1	0	0	0	2	0	0	0	1	0	0	0	2	0	3	0	11	0	0	2	0	0	0	0	0	0	0	0	0	0	0	6	0
803	1	0	1	0	3	1	0	2	0	0	8	0	0	0	0	0	2	0	0	0	1	0	0	0	0	4	0	0	0	0	0	2	0	0	3	0	5	0	0	0	0	0	0	0	0
804	0	0	0	0	6	2	2	0	0	1	0	0	0	3	0	1	0	0	2	0	1	0	0	0	0	0	1	0	23	0	0	3	0	0	1	0	0	2	0	0	1	0	0	2	0
805	4	0	0	0	6	3	0	0	0	0	0	0	1	5	0	0	0	0	1	0	14	0	0	0	0	0	0	0	11	0	0	0	0	0	0	0	0	0	0	1	1	0	0	3	0
806	0	0	4	0	1	0	0	0	0	0	0	0	0	0	0	0	0	0	0	0	0	0	0	0	0	9	0	1	0	0	0	0	0	0	6	0	0	0	0	0	0	0	0	0	0
807	0	0	0	0	0	0	0	0	0	0	0	0	0	0	0	0	0	0	0	0	0	0	0	0	2	0	0	0	0	0	0	0	0	0	0	0	0	0	0	0	0	0	0	0	0
808	1	0	0	0	9	0	0	0	0	0	3	0	0	0	0	0	0	0	0	0	21	0	0	0	0	0	0	0	1	0	1	5	0	0	0	0	0	0	0	0	0	0	0	0	0
809	2	1	0	0	3	0	0	1	0	0	0	0	0	1	0	0	0	0	11	0	7	0	0	0	0	0	0	0	7	0	0	1	0	0	1	0	0	0	0	0	0	0	0	0	0
901	0	2	0	0	0	1	0	0	0	21	0	0	0	0	0	0	0	0	0	0	0	0	0	0	0	0	0	0	0	0	0	11	0	0	7	0	0	0	0	0	0	0	0	0	0
902	0	0	0	4	4	0	3	0	0	0	0	0	1	10	1	0	15	0	0	0	0	0	0	0	0	0	2	0	0	0	0	1	0	1	1	0	2	14	0	0	0	0	0	1	0
903	1	0	0	1	1	0	0	0	0	0	0	0	2	6	1	0	0	0	1	0	2	0	0	0	0	0	27	0	5	0	0	0	1	0	0	0	0	0	0	0	3	0	0	6	0
904	0	0	0	0	0	0	0	0	0	0	0	0	0	0	0	0	0	0	0	0	0	0	0	0	0	0	0	0	0	0	0	1	0	0	0	0	0	2	0	0	0	0	0	0	0
905	1	0	0	0	1	0	0	0	0	12	0	1	1	0	0	0	1	0	0	0	0	0	0	0	0	3	0	0	10	0	0	1	0	0	0	2	0	2	0	0	0	0	0	0	1
906	0	0	0	0	0	2	5	0	0	0	0	0	0	0	0	0	12	0	0	0	0	0	0	0	0	0	0	5	0	0	0	1	0	0	1	0	3	0	0	0	0	0	0	0	0
907	0	1	0	0	0	0	0	0	0	16	0	0	1	4	0	0	3	0	0	0	0	0	0	0	0	0	3	0	1	0	0	0	0	2	2	0	0	4	0	0	0	0	0	0	0
908	0	0	0	0	1	1	8	0	0	1	0	0	1	6	2	0	1	0	0	0	4	0	0	0	0	0	12	0	3	0	0	0	4	2	1	0	0	0	0	0	0	0	0	0	0
909	0	0	2	2	0	2	0	0	0	0	0	1	0	0	0	0	0	0	0	0	1	0	0	0	0	0	0	0	0	0	0	2	0	13	0	0	1	0	0	0	0	0	0	0	0
1001	1	0	0	1	1	10	0	0	0	1	0	0	2	1	2	0	0	0	5	0	0	0	0	0	0	0	4	0	13	0	0	0	2	0	1	0	0	3	0	0	0	0	0	7	1
1002	0	1	0	0	4	3	0	0	0	0	2	0	0	0	0	0	0	0	0	0	3	0	0	0	0	0	0	0	3	0	0	4	1	0	0	0	0	0	0	0	0	0	0	0	0
1003	1	0	0	0	3	0	0	0	0	1	0	0	0	3	0	0	0	0	0	0	1	0	0	0	0	0	1	0	12	0	0	3	0	0	4	0	0	0	0	0	1	1	0	5	0
1004	6	1	0	0	5	0	0	0	0	0	0	0	0	7	0	0	0	0	3	0	1	0	0	0	0	0	1	0	7	0	0	0	1	1	1	1	0	2	0	0	0	0	0	1	0
1005	0	0	0	0	0	0	0	0	0	0	7	0	0	0	0	0	0	0	0	0	0	1	0	0	7	0	0	0	1	0	0	1	0	0	0	0	0	0	1	0	0	0	0	0	0
1006	3	0	0	0	2	2	0	0	0	0	0	0	1	0	0	3	0	0	0	0	16	0	0	0	0	0	2	0	3	0	0	2	4	2	0	3	0	0	0	0	1	0	0	5	0
1007	1	0	0	1	10	1	0	0	0	0	0	0	2	0	0	0	0	0	12	0	11	0	0	0	0	0	0	0	14	2	0	0	4	0	2	0	0	0	0	0	4	2	1	3	0
1008	0	0	0	1	9	2	0	0	0	0	6	0	0	0	0	0	0	0	0	0	1	0	0	0	0	8	0	0	0	0	0	5	0	3	1	0	1	0	2	0	0	3	0	0	0
1009	0	0	0	0	2	0	0	0	0	0	1	0	0	0	0	0	0	0	0	0	0	8	0	0	0	0	0	0	2	0	0	0	0	1	0	0	0	0	0	0	0	0	0	0	0
1010	0	0	0	0	2	4	0	0	0	0	0	0	0	0	0	1	0	0	0	0	10	3	1	0	0	0	0	0	0	0	1	0	0	0	0	0	0	0	0	0	0	0	0	0	0
1011	0	0	0	0	0	0	0	0	0	0	0	0	0	0	0	0	0	0	0	0	0	1	0	0	0	0	0	0	2	0	0	3	0	0	0	0	0	0	0	0	0	0	0	0	0
1012	0	0	0	1	7	9	0	1	0	0	0	0	0	0	0	0	0	0	0	0	7	0	0	0	0	0	0	0	0	0	0	0	0	0	1	0	0	0	2	0	0	0	0	0	0
1101	0	2	0	0	2	0	0	0	0	0	1	0	0	0	0	0	0	0	0	0	3	0	0	0	0	0	0	0	0	0	0	7	0	15	5	0	0	0	3	0	0	0	0	0	0
1102	0	0	0	1	6	0	0	0	0	2	0	1	0	9	0	0	0	0	2	0	0	0	0	1	0	0	11	0	1	0	0	0	0	0	3	1	0	0	0	1	0	0	0	5	0
1103	0	0	0	0	13	3	0	1	0	0	0	0	0	0	0	0	0	0	0	0	5	0	0	0	0	0	0	0	2	0	1	9	0	0	4	0	0	0	1	0	0	0	0	0	0
1104	9	0	0	0	5	0	0	1	0	0	0	0	0	5	0	0	0	0	1	0	0	0	0	0	0	0	7	0	0	0	0	0	2	0	0	1	0	0	0	0	0	0	1	7	0
1105	4	0	0	0	11	0	0	1	0	0	0	0	0	1	0	3	1	0	0	0	0	1	2	0	0	0	0	0	0	0	2	0	0	0	5	0	0	0	0	0	0	0	0	4	1
1106	2	1	0	0	0	0	0	0	0	0	0	0	0	1	0	0	0	0	3	3	0	0	0	0	0	0	6	0	6	0	0	1	0	0	0	0	0	0	0	0	0	0	0	0	0
1107	0	0	2	0	2	0	0	0	0	2	0	0	0	0	0	0	0	0	1	0	6	0	0	0	0	0	0	0	0	0	0	3	0	6	2	0	1	0	0	0	0	0	0	0	0
1108	0	0	0	0	8	0	0	0	0	0	0	0	1	0	0	0	1	3	3	6	5	0	0	0	0	0	0	0	1	8	0	1	3	0	1	0	0	0	0	0	0	0	0	0	0
1109	0	0	5	0	0	0	0	0	0	0	4	2	0	0	0	0	0	0	0	1	2	0	0	0	0	0	0	0	0	0	0	5	0	26	1	0	0	0	0	0	0	0	0	0	0
1201	0	0	0	0	0	0	0	1	0	0	0	0	0	0	0	0	0	0	0	0	5	1	1	0	0	0	0	0	0	4	4	1	0	3	2	0	0	0	0	0	0	0	0	0	0
1202	0	1	0	0	4	0	0	0	0	0	0	0	0	0	0	0	0	0	0	0	1	6	0	0	0	0	0	0	0	0	0	7	0	3	1	0	0	0	1	0	0	0	0	0	0
1203	0	0	0	0	0	0	0	0	0	0	0	0	0	0	0	0	0	0	0	0	0	0	0	0	1	0	0	0	0	0	0	0	0	0	0	0	0	0	0	0	0	0	0	0	0
1204	0	4	0	0	0	0	0	0	0	0	0	0	0	0	0	0	0	0	0	0	0	0	0	0	3	0	0	0	0	0	0	1	0	0	1	0	0	0	0	0	0	0	0	0	0
1205	2	4	0	0	6	0	0	0	0	0	0	0	0	0	0	0	0	0	0	0	0	0	0	0	0	0	0	0	13	0	0	0	2	0	0	0	0	0	0	0	0	0	0	3	0
1206	2	0	0	0	2	0	0	0	0	0	0	0	2	2	0	0	0	0	2	0	7	0	0	1	0	0	2	0	2	0	0	2	2	1	1	0	0	1	0	1	5	0	0	8	0
1207	0	0	0	7	0	0	0	0	0	0	0	0	2	5	0	0	1	0	4	2	4	0	0	0	1	0	12	0	1	4	0	0	1	0	2	0	0	1	0	0	4	1	0	7	0
1208	4	0	0	0	1	1	0	0	0	0	0	0	0	3	0	0	0	0	6	0	1	0	0	0	0	0	13	0	4	0	0	0	0	0	0	0	0	1	0	0	1	0	1	1	0
1209	0	0	0	0	3	0	0	0	0	0	0	0	0	0	0	0	0	0	0	0	0	0	0	0	5	1	0	0	0	0	0	14	0	4	1	0	0	0	2	0	0	0	0	0	0
1301	0	0	0	0	5	0	0	0	0	0	2	2	0	0	0	0	0	0	0	0	0	0	0	0	0	0	0	1	0	0	0	0	0	0	0	0	6	1	0	0	0	0	0	0	0
1302	0	0	0	0	6	0	3	0	0	22	0	3	1	2	0	0	0	0	0	0	0	0	0	0	0	0	2	0	6	0	0	1	0	0	5	0	0	0	0	0	0	0	0	9	0
1303	0	0	0	2	13	0	3	0	0	6	0	4	0	3	1	0	0	0	0	0	7	0	0	0	0	0	16	0	3	0	0	0	0	0	2	0	0	1	0	0	0	1	2	16	2
1304	0	0	0	0	3	3	0	0	0	0	3	0	0	0	0	0	1	0	0	1	16	0	0	0	0	0	3	0	1	1	0	0	0	0	3	0	2	1	0	0	0	0	0	1	0
1305	2	0	0	0	15	0	0	0	0	0	0	1	0	1	0	0	0	0	3	0	1	0	0	0	0	0	9	0	8	0	0	1	0	0	0	0	0	0	0	0	1	0	2	4	0
1306	0	0	1	4	12	0	0	0	0	0	5	0	0	0	0	0	0	0	0	0	0	0	0	0	0	0	0	0	0	0	0	11	0	16	1	0	2	0	0	0	0	0	0	0	0
1307	1	0	1	0	3	0	0	0	0	0	1	0	0	0	0	0	4	0	0	0	0	0	0	0	0	0	0	3	0	0	0	5	0	0	1	0	1	0	0	0	0	0	0	0	0
1308	0	1	0	0	5	5	0	0	0	0	2	0	0	0	0	0	0	0	0	0	0	0	0	0	0	7	0	5	0	0	0	2	0	2	2	0	0	0	0	0	0	0	0	0	0
1309	0	2	0	0	5	0	0	0	0	0	0	0	0	1	2	0	0	0	4	0	1	0	0	0	0	0	1	0	12	0	0	0	0	0	0	0	0	2	0	0	2	0	0	1	3
1401	0	0	0	0	8	2	0	0	0	0	3	0	0	0	0	0	0	0	3	0	3	0	0	0	0	0	0	0	0	0	0	1	2	6	5	0	0	0	0	0	0	0	0	0	0
1402	0	0	0	0	5	2	0	0	0	0	3	0	0	0	0	0	0	0	0	4	1	1	0	0	0	0	0	0	0	0	0	11	0	16	0	0	0	0	0	0	0	0	0	0	0
1403	0	0	0	0	2	0	0	0	0	0	0	0	0	0	0	0	0	0	0	0	0	0	0	0	0	0	0	0	4	0	0	0	0	0	2	0	0	0	0	0	0	0	0	0	0
1404	0	0	0	0	3	0	0	0	0	0	0	0	0	1	0	0	1	0	3	0	0	0	0	0	0	0	13	0	0	0	0	0	2	0	1	0	0	0	0	0	1	0	0	7	0
1405	0	1	0	0	13	0	2	0	0	4	0	0	0	0	2	0	0	0	0	1	0	0	0	0	0	0	12	0	9	0	0	1	1	0	4	1	0	8	0	0	0	0	0	4	1
1406	0	0	0	0	6	0	1	0	0	12	0	4	0	3	4	0	0	0	0	0	0	0	0	0	0	0	0	0	5	0	0	0	0	0	4	0	0	5	0	0	1	0	0	1	1
1407	0	0	0	2	1	4	0	0	0	3	2	0	0	0	0	0	0	0	0	0	0	0	0	0	0	0	0	0	0	0	0	3	0	14	5	0	0	0	0	0	0	0	0	0	0
1408	0	0	0	0	5	0	0	0	0	0	0	0	3	1	0	0	0	0	0	0	0	0	0	0	0	0	12	0	14	0	0	1	0	0	3	0	0	5	0	0	0	0	0	2	0
1409	0	0	0	1	3	2	0	0	0	1	0	0	1	0	0	0	0	0	0	0	0	0	0	0	0	0	1	0	6	0	0	7	0	0	4	0	0	1	0	0	0	1	0	0	0
1501	4	0	0	0	1	0	0	0	2	0	0	0	3	0	1	0	0	3	0	0	21	0	0	0	0	0	9	0	0	3	0	1	0	0	1	0	0	4	0	0	0	2	0	5	1
1502	6	0	0	0	7	0	1	1	0	1	0	0	0	0	0	1	0	0	0	0	2	0	0	2	0	0	3	0	15	0	1	0	0	0	1	0	0	0	0	0	0	0	0	4	0
1503	0	0	0	0	5	2	0	0	0	0	1	0	0	0	0	0	0	0	0	0	11	0	1	0	0	0	0	0	1	1	0	1	0	0	3	0	0	0	0	0	0	0	0	0	0
1504	0	0	0	0	5	0	0	0	0	0	1	0	0	0	0	0	0	0	0	0	4	0	0	0	0	0	0	0	0	0	2	0	0	8	1	0	0	0	0	0	0	0	0	1	0
1505	0	0	0	1	0	1	1	0	2	3	0	1	0	0	0	0	0	0	1	0	0	0	0	0	0	0	0	0	14	0	1	5	1	1	3	0	0	0	0	1	0	0	0	1	1
1506	2	0	0	0	0	0	0	0	0	0	0	0	6	0	2	0	0	0	0	2	9	0	0	0	0	0	4	0	4	0	1	0	3	0	0	0	0	2	0	0	2	0	0	3	0
1507	0	0	0	2	8	1	0	0	0	0	1	0	0	0	0	0	0	0	0	2	11	0	1	0	0	0	0	0	1	0	4	0	0	0	3	0	0	0	0	0	0	0	0	2	0
1508	0	0	0	0	1	3	0	0	0	0	1	0	0	0	0	0	0	0	0	0	0	0	0	0	0	0	0	0	0	0	0	0	0	0	4	0	0	0	0	0	0	0	0	0	1
1509	0	0	2	0	0	5	0	0	0	0	2	0	0	0	0	0	0	0	0	0	1	0	0	0	0	3	0	1	2	0	0	2	0	0	2	0	0	0	0	0	0	0	0	1	0
1601	0	3	0	4	1	1	0	0	0	0	0	0	0	0	0	0	0	0	0	0	0	0	0	0	2	1	0	2	3	0	0	6	0	0	6	0	0	1	0	0	0	0	0	0	0
1602	0	0	3	0	1	0	0	0	0	0	5	0	0	0	0	0	0	0	0	0	3	0	0	0	0	1	0	0	0	0	0	0	0	24	1	0	0	0	0	0	0	0	0	0	0
1603	5	0	0	0	2	0	0	0	0	0	0	0	1	0	0	0	0	0	6	0	1	0	0	1	0	0	4	0	0	0	0	2	3	0	0	0	0	0	0	0	0	0	0	19	0
1604	0	0	0	0	0	0	0	0	0	0	0	0	0	0	0	0	0	0	0	0	0	0	0	0	0	0	0	0	0	0	0	0	0	0	1	0	0	0	0	0	0	0	0	0	0
1605	1	0	0	2	4	0	0	0	0	0	0	0	1	7	1	0	0	0	8	0	0	0	0	0	0	0	9	0	1	0	0	1	2	0	0	0	0	0	0	0	1	0	0	1	2
1606	0	0	0	0	4	0	0	0	0	0	1	0	0	0	0	0	0	0	0	0	0	0	0	0	0	0	0	0	0	0	0	1	0	1	0	0	0	0	0	0	0	0	0	0	0
1607	0	0	2	0	0	3	0	0	0	0	2	0	0	0	0	0	0	0	0	0	0	0	0	0	0	0	0	0	0	0	0	11	0	0	0	0	0	0	0	0	0	0	0	0	0
1608	4	0	0	2	9	0	0	0	0	0	0	0	1	4	1	4	0	0	0	0	8	0	0	0	0	0	6	0	11	0	0	0	2	1	1	0	0	0	0	0	1	0	0	12	0
1609	0	1	1	0	2	0	0	0	0	0	2	0	0	0	0	0	0	0	0	0	0	0	0	0	1	0	0	2	0	0	0	7	0	1	3	0	0	0	0	0	0	0	0	0	0
1701	0	0	0	0	10	3	0	0	1	9	0	0	0	2	0	0	0	0	1	0	0	0	0	0	0	0	11	0	7	0	0	0	0	0	1	0	0	2	0	0	0	0	0	3	2
1702	0	1	0	0	4	9	0	0	0	0	5	0	0	0	0	0	0	0	0	0	5	0	0	0	0	0	0	0	1	0	0	1	0	1	0	0	0	0	0	0	0	0	0	0	0
1703	3	0	0	0	10	0	0	0	0	0	0	0	4	1	0	0	0	0	0	0	1	0	0	0	0	0	9	0	0	0	0	0	1	0	0	0	0	0	0	0	4	0	1	5	0
1704	0	0	0	0	5	1	0	0	0	0	1	0	0	0	0	0	0	0	0	0	0	0	0	0	0	0	0	1	0	0	0	12	0	0	0	0	0	0	0	0	0	0	0	0	0
1705	0	1	0	0	2	1	0	0	0	1	4	0	0	0	0	0	0	0	0	0	0	0	0	0	0	0	0	0	1	0	0	17	0	0	3	0	0	0	0	0	0	0	0	0	0
1706	0	0	0	0	7	1	0	0	0	0	0	0	0	0	1	0	0	0	0	0	11	0	0	0	0	0	0	0	0	1	1	0	0	2	9	0	0	0	0	0	0	0	0	0	0
1707	11	0	0	0	1	0	0	0	0	0	0	0	0	0	0	0	0	1	3	0	2	0	0	0	0	0	4	0	2	0	0	0	1	0	0	0	0	0	0	0	1	0	1	1	0
1708	0	0	0	0	0	1	0	0	0	0	0	0	0	0	0	0	0	0	0	0	1	0	0	0	0	0	0	0	0	0	0	4	0	0	3	0	0	0	0	0	0	0	0	0	0
1709	0	0	0	0	0	0	0	0	0	1	0	0	0	0	0	0	0	0	0	0	0	0	0	0	0	5	0	0	0	0	0	8	0	0	2	0	0	0	0	0	0	0	0	0	0
1801	2	0	0	0	0	20	0	1	0	0	0	0	0	1	0	0	0	0	1	0	2	0	0	1	0	0	9	0	4	0	0	1	2	0	0	0	0	0	0	0	0	0	1	0	0
1802	3	0	0	0	3	1	0	0	0	0	0	0	1	1	0	0	0	3	0	1	2	0	0	0	0	0	0	0	2	2	0	1	5	0	0	1	0	0	0	0	3	0	7	4	0
1803	0	0	0	0	4	4	0	1	0	0	1	0	0	0	0	0	0	0	0	0	0	0	0	0	0	0	0	1	0	0	0	2	0	0	4	0	2	0	0	0	0	0	0	0	1
1804	1	0	0	0	4	0	0	0	0	0	2	0	1	0	0	5	0	0	0	0	0	0	0	0	0	0	0	4	0	0	0	6	0	0	8	0	0	0	0	0	0	0	0	0	0
1805	3	0	1	0	1	0	0	10	0	0	0	0	1	0	0	0	0	0	0	0	0	0	0	0	0	0	0	2	0	0	0	0	0	0	1	0	0	0	0	0	0	0	0	1	0
1806	2	0	0	0	0	3	0	0	1	0	0	0	1	0	0	0	0	0	0	0	0	0	0	1	0	0	0	1	0	3	0	0	0	0	2	0	0	0	0	0	0	0	0	1	0
1807	0	0	0	2	11	4	0	1	0	0	0	0	0	0	0	0	0	0	0	0	3	0	0	0	0	0	0	0	1	0	0	0	0	2	0	0	3	0	0	0	1	0	0	0	0
1808	1	0	0	0	5	0	0	0	0	0	0	0	1	10	0	0	0	0	2	0	0	0	0	0	0	1	7	0	5	0	0	0	1	1	0	0	0	0	0	0	1	0	4	4	0
1809	0	2	0	0	0	1	0	0	0	0	0	0	1	0	0	0	0	0	0	0	0	0	1	0	0	1	0	2	0	0	0	0	0	0	1	0	20	0	1	0	0	0	0	0	1
1901	0	0	0	2	7	1	0	0	0	0	0	0	0	0	0	0	0	0	0	0	3	0	0	0	0	0	0	0	0	0	1	3	0	8	5	0	1	0	0	0	0	0	0	0	0
1902	6	0	0	2	2	7	0	0	0	0	0	0	0	1	0	0	0	1	0	0	5	0	0	0	0	0	7	0	0	1	1	0	2	1	0	0	0	0	0	0	1	0	0	10	0
1903	0	0	0	0	3	0	2	0	0	5	0	0	1	1	1	0	0	0	0	0	0	0	0	0	0	0	2	0	3	0	0	0	0	0	4	0	0	2	0	0	0	0	1	9	4
1904	0	0	0	0	0	0	0	0	0	0	0	0	0	0	0	0	0	0	0	0	0	0	0	0	5	0	0	0	0	0	0	1	0	0	5	0	0	0	0	0	0	0	0	0	0
1905	0	0	0	0	8	0	0	0	0	0	2	0	0	0	0	0	0	0	0	0	3	0	0	0	0	0	0	0	2	0	0	8	0	0	2	0	0	0	4	0	0	0	0	0	0
1906	0	0	0	0	1	0	0	0	0	0	0	0	0	0	1	0	0	0	0	0	0	0	0	0	13	0	0	0	0	0	0	4	0	0	2	0	0	0	1	0	0	0	0	0	0
1907	5	0	0	0	3	0	0	0	0	2	0	0	0	2	0	0	0	0	0	0	0	0	0	0	2	0	0	0	0	0	0	1	0	0	5	0	0	1	0	1	0	0	0	1	0
1908	0	0	0	0	0	0	0	0	0	0	1	0	0	0	0	0	0	0	0	0	0	0	0	0	0	0	0	7	0	0	0	0	0	0	2	0	0	0	0	0	0	1	0	0	0
1909	0	0	0	0	0	0	0	1	0	0	0	0	0	0	0	0	0	0	0	0	0	0	0	0	13	0	0	3	0	0	0	0	0	0	0	0	1	0	0	0	0	0	0	0	1
2001	2	2	0	0	15	0	0	0	0	3	0	0	0	6	1	0	0	0	1	0	0	0	0	0	0	0	3	0	12	0	0	3	0	0	1	0	0	1	0	0	2	0	0	2	0
2002	0	0	0	0	1	0	0	0	0	0	0	0	0	0	0	0	0	0	0	0	0	0	0	0	0	0	0	0	0	0	0	0	0	0	0	0	0	0	0	0	0	0	0	0	2
2003	0	1	0	1	3	0	0	0	0	0	1	0	0	0	0	0	0	0	0	0	1	0	0	0	0	0	0	0	0	0	0	5	0	0	1	0	0	0	0	0	0	0	0	0	0
2004	0	0	0	0	0	0	0	0	0	0	0	0	0	0	0	0	0	0	0	0	0	0	0	0	0	0	0	0	0	0	0	0	0	0	1	0	0	0	0	0	0	0	0	0	0
2005	0	4	0	0	12	3	0	0	0	0	2	0	0	0	0	0	0	0	0	0	1	0	0	0	0	0	0	0	0	0	0	8	0	0	1	0	0	0	0	0	0	0	0	0	0
2006	0	1	0	0	3	0	0	0	0	0	0	0	0	0	0	0	0	0	0	0	3	0	0	0	0	0	3	0	6	0	0	0	1	0	1	0	0	0	0	0	0	0	0	1	5
2007	0	1	0	0	8	0	0	0	0	2	0	0	0	5	0	0	0	0	0	0	0	1	0	0	0	0	4	0	8	0	0	0	0	0	2	0	0	3	0	0	3	0	0	6	2
2008	0	2	0	0	0	0	0	0	0	0	0	0	0	0	0	0	0	0	0	0	0	0	0	0	0	9	0	3	0	0	0	0	0	0	5	1	0	0	0	0	0	0	0	0	0
2009	5	1	0	0	7	1	0	0	0	1	4	0	0	0	0	0	0	0	0	0	1	0	0	1	0	0	0	0	2	0	0	0	0	0	4	0	0	0	0	0	0	0	0	1	1
2010	1	0	0	1	0	1	0	0	0	1	0	3	1	0	0	0	0	0	1	0	1	0	0	0	0	0	0	0	17	0	0	0	1	0	1	0	0	0	0	0	1	0	2	4	0
2011	0	0	0	0	9	2	0	1	0	0	1	0	0	0	0	4	0	0	1	0	8	0	0	0	0	0	0	0	0	0	3	0	0	11	2	0	0	0	0	0	0	0	0	0	0
2012	0	0	0	1	7	2	0	1	0	0	3	0	0	0	0	0	1	0	0	0	10	1	0	0	0	0	0	0	0	0	0	4	0	1	2	0	0	0	0	1	0	0	0	0	0
2101	0	0	0	2	1	1	0	0	0	0	0	0	0	1	1	0	0	0	0	0	0	0	0	0	0	0	1	0	9	0	0	0	2	3	4	0	0	1	0	0	0	0	0	1	1
2102	0	2	0	5	1	3	0	0	0	3	0	0	0	1	0	0	0	0	0	0	1	0	0	0	0	0	1	0	0	0	0	2	1	0	2	0	1	0	1	0	0	0	0	0	0
2103	0	0	0	1	3	2	0	0	0	0	0	0	0	0	0	0	1	0	0	0	4	0	1	0	0	0	0	0	0	0	0	6	0	15	0	0	0	0	0	0	0	0	0	0	0
2104	2	0	0	0	2	0	0	1	0	0	0	0	0	8	1	0	1	0	0	0	3	0	0	0	0	0	9	0	1	0	0	0	2	0	0	2	0	0	0	0	0	0	2	3	0
2105	1	0	0	1	6	1	0	0	0	0	0	0	0	0	0	0	0	0	0	0	3	1	0	1	0	0	0	0	2	0	0	1	0	1	5	0	0	0	1	0	0	0	0	2	1
2106	2	3	0	0	3	0	2	0	0	0	0	0	0	0	0	0	1	0	5	0	8	0	0	0	0	0	11	0	9	1	1	1	2	0	1	0	0	0	0	0	0	0	0	3	0
2107	1	0	0	8	12	0	1	0	0	0	0	0	0	8	2	0	0	0	0	0	0	0	0	0	0	0	28	0	2	0	0	0	1	1	0	6	0	0	0	0	3	0	3	22	0
2108	0	0	0	0	1	5	1	0	0	6	0	0	0	0	4	0	0	0	0	0	3	0	0	0	0	0	3	0	6	0	0	0	0	5	7	0	0	2	0	0	0	0	0	0	1
2109	0	0	0	0	2	5	1	0	0	0	0	0	0	0	0	0	0	0	0	0	2	2	0	0	0	0	0	0	0	0	1	1	0	6	1	0	2	0	0	0	0	0	0	0	2
2201	0	0	0	0	3	0	0	0	0	0	0	0	0	0	0	0	0	0	0	0	0	0	0	0	0	0	0	0	1	0	0	6	0	1	4	0	0	0	0	0	0	0	0	0	0
2202	0	0	0	0	7	0	0	0	0	0	2	0	0	0	0	0	0	0	0	0	0	1	0	0	0	0	0	1	0	0	0	4	0	0	6	0	0	0	0	0	0	0	0	0	0
2203	2	0	0	0	0	0	0	0	0	3	0	0	0	0	0	0	0	0	0	0	5	0	0	0	0	0	0	0	2	0	0	2	0	0	5	0	0	1	0	0	0	0	0	1	0
2206	0	1	0	1	5	0	0	0	0	0	0	0	0	0	1	0	0	0	0	0	2	0	0	0	0	0	0	0	2	0	0	2	0	0	9	0	0	1	0	0	0	0	0	1	0
2207	0	0	0	0	0	0	0	0	0	0	0	0	0	0	0	0	0	0	0	0	2	1	0	0	0	0	0	0	0	0	0	0	0	0	1	0	0	0	0	0	0	0	0	0	0
2208	1	1	0	0	1	0	0	0	0	0	0	0	0	0	0	0	0	0	0	0	0	0	0	0	8	0	0	0	0	0	0	0	0	0	3	0	0	4	0	5	0	0	0	0	0
2209	0	0	0	0	0	0	0	0	0	0	0	0	0	0	0	0	0	0	0	0	0	0	0	0	0	0	0	0	0	0	0	0	0	0	5	0	0	0	0	0	0	0	0	0	3
2301	0	0	0	0	9	0	0	0	0	11	0	0	0	2	0	0	1	0	0	0	2	0	0	0	0	0	8	0	8	0	0	1	1	0	0	0	0	5	0	0	0	0	0	5	0
2302	4	0	0	0	5	0	1	0	0	0	0	0	4	0	0	0	0	2	2	1	0	0	0	0	0	0	13	0	0	0	1	0	4	0	0	0	0	1	0	0	4	0	0	3	0
2303	0	0	0	1	5	7	0	1	0	0	0	0	0	0	0	2	0	1	3	0	5	0	0	0	0	0	0	2	1	0	0	2	0	3	0	0	0	0	0	0	0	0	0	0	0
2304	0	2	0	1	2	4	0	0	0	0	2	0	0	0	0	0	0	0	0	1	1	0	0	0	0	0	0	0	1	0	0	2	0	13	1	0	0	0	0	0	0	0	0	0	0
2305	0	1	0	1	0	5	0	0	0	0	4	0	0	0	0	0	4	0	0	0	0	0	0	0	0	0	0	0	1	0	0	5	0	2	2	0	0	0	0	0	0	0	0	0	0
2306	0	0	0	1	0	3	0	0	0	0	0	0	0	0	0	0	3	0	0	0	0	0	0	0	0	1	0	2	0	0	1	10	0	2	4	0	3	0	0	0	0	0	0	0	0
2307	0	0	0	1	0	2	0	0	0	0	2	0	0	0	0	0	0	0	0	0	1	0	0	0	1	0	0	0	0	0	0	5	0	9	4	0	1	0	0	0	0	0	0	0	1
2308	3	0	0	2	2	0	1	0	0	0	0	0	1	0	0	0	0	1	1	1	2	0	0	1	0	0	3	0	1	0	0	2	2	0	3	0	1	0	0	0	4	0	1	6	0
2309	0	0	0	0	3	11	0	1	0	0	2	0	0	0	0	0	1	0	0	0	4	0	1	1	0	0	0	0	1	0	0	0	0	0	0	0	0	0	0	0	0	0	0	0	2
3010	3	0	0	0	8	0	0	0	0	0	0	0	0	0	0	0	0	0	0	0	0	0	0	0	6	0	0	0	0	0	0	0	0	0	5	1	0	0	0	1	0	0	0	0	5
3011	0	0	0	0	1	0	0	0	0	0	0	0	0	0	0	0	0	0	0	0	1	2	0	0	0	0	0	0	0	0	0	6	0	5	3	0	0	0	0	0	0	0	0	0	0
3012	0	0	0	0	2	0	0	0	0	0	0	1	0	0	0	0	0	0	0	0	0	0	0	0	1	3	0	1	2	0	0	6	0	1	4	0	0	0	0	0	0	0	0	0	0
4010	0	0	0	0	2	0	0	0	0	0	0	0	1	2	2	3	1	0	0	0	3	0	1	0	0	0	0	0	5	4	0	0	0	0	4	0	0	4	0	0	2	0	0	6	2
4011	0	0	0	0	5	0	0	1	0	0	1	0	0	0	0	1	0	0	0	1	0	0	1	0	0	0	0	4	0	0	0	0	0	0	0	0	21	0	0	0	0	0	0	0	0
4012	1	0	0	0	4	0	0	1	0	0	1	0	0	0	0	0	0	0	0	0	6	0	0	0	0	0	0	1	0	0	4	0	0	0	1	0	5	2	0	0	0	0	0	0	0
5010	0	1	0	0	5	0	0	0	0	2	2	0	0	1	0	0	0	0	0	0	0	0	0	0	0	0	1	0	12	0	0	0	0	0	5	0	0	0	0	1	0	2	0	4	0
5011	0	0	0	0	0	0	0	0	0	0	0	0	0	0	0	0	0	0	0	0	3	0	0	0	0	0	0	0	3	0	0	5	0	0	0	0	0	1	0	0	1	0	0	0	0
5012	0	0	0	0	3	0	0	0	0	0	0	0	0	0	0	0	0	0	0	0	0	0	0	0	0	0	0	0	16	0	0	0	0	0	1	0	0	0	0	0	0	0	0	0	0
6010	0	0	0	0	4	0	0	0	0	0	0	0	0	1	0	0	0	0	0	0	4	0	0	0	0	0	0	0	3	0	0	2	4	0	3	0	0	5	0	0	0	0	0	0	0
6011	2	1	0	0	0	0	0	0	0	0	0	0	0	6	1	0	0	0	5	0	9	0	0	0	0	0	4	0	4	1	0	0	0	0	0	0	0	8	0	2	1	4	0	1	0
6012	0	1	0	0	0	0	0	0	0	0	0	0	0	0	0	0	1	0	0	0	5	0	0	0	0	0	0	0	0	0	0	4	0	3	3	0	1	0	0	0	0	0	0	0	1
7010	3	0	0	0	0	0	0	0	1	0	0	0	2	15	0	0	0	0	4	0	10	0	0	0	0	0	4	0	4	1	0	0	1	2	0	0	0	1	0	0	1	0	0	8	2
7011	0	0	3	0	1	0	0	0	0	0	0	0	0	0	0	0	1	0	0	0	0	0	0	0	0	0	0	4	0	0	0	0	0	0	1	0	14	0	0	0	0	0	0	0	1
7012	0	0	0	0	1	0	0	0	0	0	0	0	0	0	0	0	0	0	0	0	0	2	0	0	3	0	1	0	0	0	0	2	0	0	0	0	0	0	0	0	0	0	0	0	0
8010	0	0	0	0	0	0	0	0	0	0	4	0	0	0	0	0	0	0	0	0	0	0	0	0	0	2	0	0	0	0	0	3	0	0	0	0	0	0	0	0	0	0	0	0	0
8011	0	0	0	0	6	0	0	0	0	1	0	0	0	1	0	0	0	0	1	0	0	0	0	0	1	0	0	0	10	0	0	0	0	0	0	0	0	0	0	0	0	0	0	0	0
8012	0	3	0	0	4	10	0	0	0	3	0	0	0	0	0	0	0	0	0	0	0	4	0	0	2	0	0	0	8	0	0	0	0	0	0	0	0	0	0	1	0	0	0	0	0
9010	0	0	0	1	0	6	0	0	0	0	0	1	0	0	0	0	0	0	0	0	1	0	0	0	0	0	0	1	4	0	0	9	0	5	0	0	0	0	0	0	0	0	0	0	0
9011	0	1	0	1	1	0	1	0	0	28	0	1	0	0	0	0	0	0	0	0	0	0	0	0	0	1	0	0	1	0	0	3	0	0	2	0	0	1	0	0	1	0	0	0	0
9012	0	0	0	0	0	3	0	0	0	0	0	0	0	0	0	0	0	0	0	0	0	0	0	0	0	0	0	5	1	0	0	0	0	0	1	0	5	0	0	0	0	0	0	0	1
10010	1	2	0	0	6	1	0	0	0	4	0	0	0	0	0	0	1	0	1	0	3	0	0	0	0	0	0	0	12	0	0	4	0	0	4	0	1	3	0	0	0	0	0	5	0
10011	0	0	0	0	4	0	0	0	0	0	2	0	0	0	0	0	0	0	0	0	0	0	0	0	0	0	0	0	5	0	0	10	0	0	1	0	0	0	0	0	0	0	0	0	1
10012	2	0	0	0	4	0	0	0	0	2	0	0	0	0	0	0	0	0	2	0	0	0	0	0	0	0	9	0	2	0	0	0	2	0	0	1	0	0	0	0	0	1	4	5	1
11010	0	0	0	2	3	0	0	0	0	0	8	0	0	1	0	0	0	0	0	0	0	0	0	0	0	0	0	0	0	0	0	4	0	12	1	0	0	0	1	0	0	0	0	0	0
11011	0	0	0	2	11	0	0	0	0	0	0	1	0	0	0	0	0	0	0	0	0	0	0	0	0	0	2	0	7	0	0	5	0	3	1	0	0	0	0	0	0	0	0	0	0
11012	0	0	0	2	3	0	0	0	0	0	1	0	0	0	0	0	0	0	0	0	0	0	0	0	0	0	0	3	0	0	0	9	0	0	4	0	0	0	0	0	0	0	0	0	0
12010	0	0	4	0	0	0	0	0	0	0	0	0	1	0	0	0	0	0	0	0	0	0	0	0	5	3	0	5	0	0	0	0	0	0	1	0	0	0	0	0	0	2	0	0	0
12011	0	0	0	1	3	0	0	0	0	0	1	0	0	0	0	0	0	0	2	1	4	0	2	0	0	0	0	0	0	0	2	0	0	8	1	0	0	1	0	0	0	0	0	1	0
12012	0	0	0	0	2	0	0	1	0	0	0	0	0	0	0	0	0	0	0	0	0	0	1	0	0	0	0	0	0	0	1	0	0	0	0	0	0	0	0	0	0	0	0	1	0
13010	0	0	0	5	8	0	0	0	0	0	0	0	0	3	0	0	0	0	2	0	1	0	0	0	0	0	4	0	3	0	0	0	2	0	0	0	0	0	0	0	3	0	0	0	0
13011	0	0	0	0	5	0	1	0	1	7	0	2	0	1	7	0	0	0	0	0	0	0	0	0	0	0	0	0	10	0	0	4	0	0	2	1	0	2	0	0	0	0	0	1	1
13012	0	0	0	0	13	0	0	0	0	0	0	0	0	5	0	0	0	0	2	0	0	0	0	0	0	0	0	0	18	0	0	5	0	0	0	0	0	0	0	0	0	0	0	1	3
14010	0	0	0	0	2	1	0	0	0	0	0	0	0	0	0	0	0	0	0	0	0	0	0	0	0	0	0	0	1	0	0	0	0	0	0	0	0	0	0	0	0	0	0	0	0
14011	0	3	0	1	9	0	0	0	0	0	0	0	1	3	0	0	0	0	0	0	0	0	0	0	2	0	0	0	13	0	0	0	0	0	1	0	0	0	0	2	0	0	0	0	0
14012	0	1	1	0	7	1	0	0	0	0	2	0	0	0	0	0	0	0	0	0	0	3	0	0	0	0	0	2	0	0	0	9	0	0	2	0	0	0	0	0	0	0	0	0	0
15010	0	0	0	0	3	4	0	0	0	3	0	1	0	0	0	0	0	0	0	0	1	0	0	0	0	0	1	0	7	0	0	5	0	0	6	3	0	0	0	0	2	0	0	1	2
15011	0	1	0	0	1	0	0	0	0	0	3	0	0	0	0	0	0	0	0	0	0	0	0	0	0	0	0	0	1	0	0	2	0	0	2	0	0	0	0	0	0	0	0	0	0
15012	0	0	0	0	6	4	0	0	0	0	1	0	0	0	0	0	0	0	0	0	9	0	0	0	0	0	0	0	0	0	1	4	0	9	0	0	0	0	0	0	0	0	0	0	0
16010	1	0	0	1	3	0	0	0	0	0	0	0	0	0	0	3	1	0	0	0	13	0	1	0	0	0	0	0	0	0	0	0	2	4	5	0	0	0	0	0	0	0	1	0	1
16011	0	4	0	0	0	1	0	0	0	0	9	0	0	0	0	0	0	0	0	0	0	0	0	0	0	0	0	0	0	0	0	0	0	2	4	0	0	0	0	0	0	0	0	0	0
16012	0	0	0	0	9	8	0	0	0	0	2	0	0	0	0	0	0	0	0	0	6	0	0	0	0	0	0	1	0	0	1	1	0	3	0	0	0	0	0	0	0	0	0	0	0
17010	5	0	0	0	3	0	0	0	0	0	0	0	0	3	0	0	0	0	0	0	0	0	0	0	0	0	4	0	13	0	0	0	3	0	0	0	0	0	0	0	3	0	0	5	0
17011	0	0	0	0	8	0	0	2	0	0	0	0	0	0	0	1	0	0	0	0	6	0	0	0	0	0	0	0	1	0	0	0	0	0	1	0	0	0	0	0	0	0	0	0	0
17012	0	1	0	1	0	0	0	0	0	0	2	0	0	0	0	0	0	0	0	0	0	0	0	0	0	0	0	1	0	0	0	6	0	0	5	0	0	0	0	0	0	0	0	0	0
18010	0	0	0	0	1	3	0	0	1	0	0	0	3	0	0	4	0	0	0	1	0	0	0	0	0	1	0	1	0	0	0	0	0	0	4	1	13	0	0	0	0	0	0	0	0
18011	0	0	2	0	2	4	0	0	2	0	3	0	3	0	0	0	1	0	0	0	0	0	0	0	0	0	0	4	0	0	0	0	0	0	2	0	3	0	0	0	0	0	0	0	0
18012	0	0	0	0	6	0	0	0	0	0	2	0	1	0	0	1	0	0	0	0	4	0	0	0	0	0	1	7	0	0	0	0	0	0	0	0	8	0	0	0	1	1	0	0	0
19010	0	0	0	0	0	0	0	0	0	0	2	0	0	0	0	0	0	0	0	0	0	1	0	0	6	0	0	2	0	0	0	0	0	0	0	0	0	0	0	0	0	0	0	0	1
19011	4	0	0	0	2	0	2	0	0	0	1	0	1	0	0	0	0	0	0	0	2	0	0	0	0	0	22	0	0	0	0	1	1	0	2	0	0	0	0	0	2	0	0	3	0
19012	3	0	0	0	0	0	1	1	0	1	0	0	0	0	0	0	0	0	0	0	0	0	0	0	1	0	24	0	4	0	0	0	0	0	0	2	0	0	0	0	0	0	1	6	1
20010	1	0	2	0	2	0	0	1	0	0	1	0	0	0	0	0	0	0	0	0	3	0	0	0	0	0	0	1	1	0	0	1	0	0	0	0	1	0	0	0	1	1	0	0	1
20011	0	0	3	0	4	3	0	0	0	0	2	0	0	0	0	0	0	0	0	0	0	0	0	0	0	0	0	0	0	0	0	0	0	1	0	0	0	0	0	0	0	0	0	0	1
20012	0	0	0	0	0	0	0	0	0	0	0	0	0	0	0	0	0	0	0	0	0	0	0	0	0	0	0	0	0	0	0	0	0	0	2	0	0	0	0	0	0	0	0	0	0
21010	1	0	0	0	4	0	1	0	0	10	0	0	0	0	2	0	0	0	0	0	0	0	0	0	0	0	13	0	10	0	0	0	0	0	0	1	0	3	0	0	5	0	0	6	0
21011	0	0	0	1	5	3	0	0	0	5	3	0	0	0	0	0	0	0	0	0	1	4	0	0	0	0	0	0	2	0	0	11	0	2	3	0	0	0	0	0	0	0	0	0	0
21012	0	0	0	1	8	0	0	0	0	10	0	0	0	1	4	0	2	0	0	0	1	0	0	0	0	0	9	0	16	0	0	0	0	0	0	0	0	1	0	0	1	0	0	5	0
22010	0	0	0	0	2	0	0	0	0	2	0	0	0	0	1	0	0	0	0	0	0	0	0	0	0	0	0	0	0	0	0	1	0	0	1	0	0	0	0	0	0	0	0	0	0
22011	0	0	0	0	9	0	0	0	0	9	0	0	0	1	0	0	0	0	0	0	0	0	0	0	0	0	0	0	5	0	0	1	0	0	0	0	0	1	0	0	0	0	0	0	1
22012	0	0	0	0	13	0	0	0	0	0	0	0	0	2	0	0	0	0	0	0	1	0	0	0	0	0	0	0	0	0	0	0	0	0	2	1	0	0	0	0	0	0	0	0	1
23010	6	0	0	0	14	0	0	0	0	0	0	0	0	3	0	1	0	0	4	1	0	0	0	5	0	0	0	0	4	0	0	0	1	0	1	0	0	0	0	2	8	0	0	0	0
23011	0	2	0	4	4	6	0	0	0	0	1	0	0	0	0	0	0	0	0	0	3	0	0	1	0	0	0	1	0	0	1	0	0	5	0	0	0	0	0	0	0	0	0	0	0
23012	2	0	0	0	1	0	0	0	0	1	0	0	0	0	0	0	2	0	0	0	1	0	0	1	0	0	6	0	2	0	0	0	4	1	1	4	0	0	0	0	0	0	3	0	0

## Sheet: Table S6
Table S6 Standardized functional traits
	EST_LOG10_LA	EST_LOG10_PL	EST_WSG	EST_LC	EST_Ex	EST_Sp	EST_Dis	EST_LD	EST_LPb	EST_Lpulv	EST_LDMC	EST_SLA
ACAGAU	-2.07	0.47	0.93	1.18	-0.42	2.65	-0.78	0.84	-0.59	1.67	0.48	0.97
ACAPEN	-4.32	-0.63	1.74	1.18	-0.42	2.65	-0.78	0.84	-0.59	1.67	0.9	-0.27
BAUUNG	0.57	0.09	1.13	-0.84	-0.42	-0.37	-0.78	-1.18	-0.59	1.67	0.62	0.67
BOUPUL	1.1	1.03	0.33	-0.84	-0.42	-0.37	-0.78	0.84	-0.59	-0.59	-1.36	-0.39
BURSIM	0.39	1.41	-1.79	1.18	2.33	-0.37	1.26	0.84	-0.59	-0.59	-0.8	-0.48
CAEGAU	-1.12	0.33	0.93	1.18	-0.42	-0.37	-0.78	0.84	-0.59	1.67	1.47	-0.62
CALPAL	0.18	-0.83	0.73	-0.84	-0.42	-0.37	1.26	-1.18	-0.59	-0.59	0.05	-0.87
CHLMAN	-2	-0.05	-0.63	1.18	-0.42	2.65	-0.78	0.84	-0.59	1.67	0.9	-0.2
COCACA	0.65	0.31	-0.33	-0.84	-0.42	-0.37	1.26	-1.18	-0.59	-0.59	-0.09	0.51
COCSPI	1.29	0.44	0.73	-0.84	-0.42	-0.37	1.26	-1.18	-0.59	-0.59	0.19	-1.64
COCVIT	1.61	2.06	-2.44	-0.84	2.33	-0.37	-0.78	0.84	-0.59	-0.59	-1.36	0.26
CROREF	0.93	0.8	1.89	-0.84	2.33	-0.37	-0.78	-1.18	-0.59	-0.59	-1.22	0.17
DIOANI	-0.29	-1.84	1.13	-0.84	-0.42	-0.37	1.26	-1.18	-0.59	-0.59	0.62	-0.07
DIOTET	0.21	-1.28	0.53	-0.84	-0.42	-0.37	1.26	-1.18	-0.59	-0.59	0.05	-0.53
DIOYUC	-0.12	-0.47	0.33	-0.84	-0.42	-0.37	1.26	-1.18	1.67	-0.59	1.33	-1.56
ERYROT	-0.93	-1.66	0.93	-0.84	-0.42	-0.37	1.26	-1.18	-0.59	-0.59	1.04	0.13
EUGAXI	-0.19	-1.55	0.28	-0.84	-0.42	-0.37	1.26	-1.18	1.67	-0.59	0.62	-0.68
EUGBUX	-0.28	-1.24	0.98	-0.84	-0.42	-0.37	-0.78	-1.18	-0.59	-0.59	0.76	-1.58
EXOCAR	0.08	-0.23	0.83	-0.84	-0.42	-0.37	1.26	-1.18	-0.59	-0.59	-0.23	-0.16
GUEELL	0	-1.04	0.58	-0.84	-0.42	-0.37	1.26	0.84	-0.59	-0.59	0.34	-0.07
GYMFLO	-0.01	-1.55	0.38	-0.84	-0.42	-0.37	-0.78	-1.18	1.67	-0.59	0.48	-0.12
HELDON	0.9	0.78	-1.74	-0.84	2.33	-0.37	1.26	0.84	-0.59	-0.59	-2.07	1.94
JATGAU	1.11	1.48	-1.44	-0.84	2.33	-0.37	-0.78	0.84	-0.59	-0.59	-1.79	0.32
KARHUM	-0.12	-0.61	0.73	-0.84	-0.42	-0.37	1.26	-1.18	-0.59	-0.59	0.62	0.09
LEULEU	-1.94	0.58	0.23	1.18	-0.42	-0.37	-0.78	0.84	-0.59	1.67	-1.08	1.71
LONRUG	-0.04	1	1.18	1.18	-0.42	-0.37	-0.78	0.84	1.67	1.67	0.19	-0.67
LONXUL	-0.12	0.4	0.53	1.18	-0.42	-0.37	-0.78	-1.18	-0.59	1.67	0.34	0.09
LUESPE	1.36	-0.36	0.02	-0.84	-0.42	-0.37	-0.78	0.84	1.67	-0.59	0.34	0.36
LYSLAT	-2.18	1.25	-0.83	1.18	2.33	-0.37	-0.78	0.84	-0.59	1.67	1.18	-1.03
MACLIN	-0.4	-1.44	1.38	-0.84	-0.42	-0.37	-0.78	0.84	-0.59	-0.59	-0.51	1.22
MALGLA	-0.04	-1.17	0.98	-0.84	-0.42	-0.37	1.26	0.84	-0.59	-0.59	-0.09	-0.54
MIMBAH	-1.86	-0.27	0.98	1.18	-0.42	2.65	-0.78	0.84	-0.59	1.67	0.62	0.01
NEEPSY	0.26	-0.3	-0.03	-0.84	-0.42	-0.37	1.26	-1.18	-0.59	-0.59	0.05	-0.79
NEOEMA	0.95	0.42	0.43	-0.84	-0.42	-0.37	-0.78	0.84	-0.59	-0.59	0.62	-0.46
PISPIS	0.29	0.87	0.33	1.18	-0.42	-0.37	-0.78	0.84	1.67	1.67	-0.51	-1.15
PLAYUC	-0.04	0.69	0.93	1.18	-0.42	-0.37	-0.78	0.84	-0.59	1.67	0.9	-0.57
PSISAR	-0.19	-1.28	0.68	-0.84	-0.42	-0.37	1.26	0.84	-0.59	-0.59	0.76	-0.64
SEMMEX	0.82	-0.61	0.12	-0.84	2.33	-0.37	-0.78	-1.18	-0.59	-0.59	-0.37	-1.31
SENATO	0.36	1.09	-0.08	1.18	-0.42	-0.37	-0.78	0.84	1.67	1.67	-1.08	-0.14
SENRAC	-0.5	0.53	-0.18	1.18	-0.42	-0.37	-0.78	0.84	-0.59	1.67	-0.51	0.11
SIDOBT	0.04	-0.56	1.79	-0.84	-0.42	-0.37	1.26	-1.18	-0.59	-0.59	1.04	-1.55
TABCHR	0.52	1.52	0.17	1.18	-0.42	-0.37	-0.78	0.84	1.67	-0.59	-0.09	0.09
TALOLI	0.2	0.42	-0.03	1.18	-0.42	-0.37	1.26	-1.18	-0.59	-0.59	1.75	-0.96
THOPAU	-0.28	0.58	1.13	1.18	-0.42	-0.37	-0.78	0.84	-0.59	-0.59	0.48	0.02
VITGAU	0.63	1.59	-0.33	1.18	-0.42	-0.37	1.26	0.84	1.67	-0.59	-0.09	-0.75
